## 31 **Summary Statement**

32 RNAseq and gene knockout via transgenic RNAi lines suggest that physiological responses to  
33 low temperatures are largely distinct across life stages of the fly *Drosophila melanogaster*.

## 34 **Abstract**

35 Organisms with complex life cycles demonstrate a remarkable ability to change their  
36 phenotypes across development, presumably as an evolutionary adaptation to developmentally  
37 variable environments. Developmental variation in environmentally sensitive performance, and  
38 thermal sensitivity in particular, has been well documented in holometabolous insects. For  
39 example, thermal performance in adults and juvenile stages exhibit little genetic correlation  
40 (genetic decoupling) and can evolve independently, resulting in divergent thermal responses.  
41 Yet, we understand very little about how this genetic decoupling occurs. We tested the  
42 hypothesis that genetic decoupling of thermal physiology is driven by fundamental differences in  
43 physiology between life stages, despite a potentially conserved Cellular Stress Response. We  
44 used RNAseq to compare transcript expression in response to a cold stressor in *Drosophila*  
45 *melanogaster* larvae and adults and used RNAi (RNA interference) to test whether knocking  
46 down nine target genes differentially affected larval and adult cold tolerance. Transcriptomic  
47 responses of whole larvae and adults during and following exposure to -5°C were largely unique  
48 both in identity of responding transcripts and in temporal dynamics. Further, we found no  
49 relationship between stage-specificity and tissue-specificity of transcripts, suggesting that the  
50 differences are not simply driven by differences in tissue composition across development. In  
51 addition, RNAi of target genes resulted in largely stage-specific and sometimes sex-specific  
52 effects on cold tolerance. The combined evidence suggests that thermal physiology is largely  
53 stage-specific at the level of gene expression, and thus natural selection may be acting on  
54 different loci during the independent thermal adaptation of different life stages.

55

## 56 **List of symbols and abbreviations**

57 CSR – Cellular Stress Response

58 DAVID - The Database for Annotation, Visualization and Integrated Discovery

59 DE – Differentially Expressed

60 DGRP – *Drosophila* Genetic Reference Panel

- 61 dsRNA - Double-Stranded RNA
- 62 FDR – False Discovery Rate
- 63 FPKM – Fragments Per Kilobase of transcript per Million mapped reads
- 64 GO – Gene Ontology
- 65 HSP – Heat Shock Protein
- 66 KEGG – Kyoto Encyclopedia of Genes and Genomes
- 67 MDS – Multi-Dimensional Scaling
- 68 RNAi - RNA Interference
- 69 SNP – Single Nucleotide Polymorphism
- 70 TRiP – Transgenic RNAi Project
- 71

## 72 **Introduction**

73 Many organisms developing from juvenile life stages through adulthood are faced with changing  
74 environmental conditions that differ dramatically but predictably during development. These  
75 shifting conditions may include resource availability, predator/herbivore abundance, and abiotic  
76 factors such as temperature (Krebs and Loeschcke, 1995; Ragland and Kingsolver, 2008; Woods,  
77 2013). To survive these environmental changes, organisms may also dramatically change their  
78 morphology, behavior, and physiology across development. For example, juvenile stages often  
79 specialize for feeding and growth, while adults primarily (and sometimes exclusively) disperse  
80 and mate (Kingsolver et al., 2011; McGraw and Antonovics, 1983; Moran, 1994; Schluter et al.,  
81 1991). These developmentally-variable environments and key fitness components (e.g., growth  
82 vs. reproduction) lead to shifting natural selection, which may favor different trait combinations  
83 in different life stages (Haldane, 1932; Moran, 1994). This is perhaps most apparent in  
84 organisms that metamorphose like amphibians and holometabolous insects. Their morphology  
85 has evolved independently in juvenile and adult stages that inhabit drastically different  
86 ecological niches. There are clear physiological differences across complex life cycle stages as  
87 well, in part because distinct developmental machinery underlies distinct morphologies and life  
88 history strategies across the life cycle (Arbeitman et al., 2002; Herrig et al., 2021; van Gestel et  
89 al., 2019). Such morphological and developmental decoupling supports the adaptive decoupling  
90 hypothesis, which posits that natural selection favors reduced genetic correlation across  
91 developmental stages to allow for stage-specific adaptation (Moran, 1994).

92  
93 In addition to developmental differences in ‘baseline’ physiology, physiological responses to  
94 environmental perturbations may also vary across the life cycle. Many key studies have  
95 examined developmental variation in environmental responses by manipulating temperature, a  
96 nearly universal selective factor that often varies over the course of development (Bowler and  
97 Terblanche, 2008; Jensen et al., 2007; Klockmann et al., 2017). Most of these studies show that  
98 thermal responses (survival and various metrics of performance) have very low or absent genetic  
99 correlations between juvenile and adult stages of holometabolous insects (Dierks et al., 2012;  
100 Gilchrist et al., 1997; Loeschcke and Krebs, 1996; Tucić, 1979). Indeed, our recent studies show  
101 that the genetic correlation between juvenile and adult cold hardiness in the fly *Drosophila*  
102 *melanogaster* are not detectably higher than zero, with no evidence for pleiotropic effects of SNP

103 (single nucleotide polymorphism) variation on thermal performance across metamorphosis  
104 (Freda et al., 2017; Freda et al., 2019).

105  
106 We reason that there are two hypotheses that could explain such extreme genetic decoupling of  
107 thermal physiology across development. The first, the ‘developmentally distinct physiology’  
108 hypothesis, posits that environmental responses may indeed be very different across life stages,  
109 mirroring the differences in developmental regulation. In this scenario different genes would  
110 contribute to environmental responses across stages, with relatively low cross-stage pleiotropy.

111  
112 Though the developmentally distinct physiology hypothesis is consistent with the observed lack  
113 of genetic correlations across life stages, it would be somewhat at odds with predictions based on  
114 the conserved cellular stress response. The Cellular Stress Response, or CSR, is an apparently  
115 conserved set of changes in cell physiology in response to a variety of environmental stressors  
116 (Kültz, 2005). For example, heat shock proteins and related chaperonins are up-regulated in  
117 response to multiple stressors, including temperatures that are relatively hot or cold compared to  
118 an organism’s optimal environmental temperature (Colinet et al., 2010b; Philip and Lee, 2010;  
119 Yocum, 2001). If these heat shock responses and other elements of the CSR have a substantial  
120 role in whole-organism level environmental responses, then many elements of environmental  
121 physiological responses should be very similar across the life cycle. Some elements of  
122 environmental physiological responses are admittedly tissue specific. For example, ion  
123 homeostasis in the gut and central nervous system has a well-established role in the response to  
124 mild low temperatures in many insect species (MacMillan et al., 2015; Overgaard and  
125 MacMillan, 2017). However, such tissue-specific responses may also contribute similarly to  
126 environmental responses across life stages.

127  
128 Such conserved cellular and tissue-level responses would argue for a second, ‘developmentally  
129 conserved physiology’ hypothesis, positing that thermal physiology could be largely conserved  
130 across development, with only a few stage-specific processes harboring segregating genetic  
131 variation. This explanation is less obvious, but still consistent with the observed lack of genetic  
132 correlations for environmental physiology across life stages. In this scenario there may be many  
133 processes (e.g., the CSR) that universally affect thermal physiology across development, but

134 genetic loci that regulate these processes are highly conserved, and thus not genetically variable.  
135 Genetic correlations only assess whether *variants* at loci affect two traits (e.g., juvenile and adult  
136 performance), not whether a given locus itself affects the traits. Thus, these conserved loci would  
137 not influence measures of genetic correlations. Rather, a subset of an environmental response  
138 may be stage-specific and mediated by genetically variable loci. This scenario could also  
139 generate low genetic correlations across life stages.

140  
141 To test these two hypotheses, we examined physiological responses to cold across the life cycle  
142 in *D. melanogaster*, using two approaches to compare larvae (juveniles) and adults separated by  
143 a major metamorphic transition. First, we tested whether whole transcriptome responses to low  
144 temperature exposure differ in identity of responding transcripts and/or their temporal patterns of  
145 differential expression. Transcriptome sequencing provides a broad snapshot of organismal  
146 physiology, and allowed us to assess the similarity of the environmental (temperature) response  
147 across the two life cycle stages. Second, we tested whether knocking down a set of nine  
148 candidate genes affected response to low temperature in larvae, adults, or both. We selected  
149 these candidates based on a previous study that found evidence for knockout effects on cold  
150 performance in adult *D. melanogaster* (Teets and Hahn, 2018). Though the sample of nine genes  
151 is relatively small, it provides a first functional test for the presence of stage-specific (consistent  
152 with the developmentally distinct physiology hypothesis) or cross-stage (consistent with the  
153 developmentally conserved hypothesis) genetic effects on environmental physiology regardless  
154 of genetic variability.

155

## 156 **Materials and Methods**

### 157 *Fly rearing*

158 We obtained all *D. melanogaster* (Meigen) lines (Table S1) from the Bloomington Drosophila  
159 Stock Center (BDSC; Bloomington IN, USA) at Indiana University – specific lines used in this  
160 study are described below. We reared flies at 25°C, 12:12 L:D in narrow vials on media  
161 containing agar, cornmeal, molasses, yeast, and antimicrobial agents propionic acid and  
162 Tegosept (Genesee Scientific, Morrisville NC, USA), as described previously (Freda et al., 2017;  
163 Freda et al., 2019). We sorted parental flies from appropriate lines (details below) under light

164 CO<sub>2</sub> anesthesia and transferred them into fresh vials containing media sprinkled with dry, active  
165 yeast to facilitate oviposition. We then transferred the parents each day for four consecutive days  
166 into fresh vials to produce offspring for use in experiments. The vials from the first egg-laying  
167 day were discarded to remove any residual effect of anesthesia on oviposition. We collected third  
168 instar larvae and 5 d-old adults for use in both experiments described below. We extracted  
169 experimental third instar feeding larvae from cultures 5 d post-oviposition using a 20% w/v  
170 sucrose solution and following the protocol of Freda et al. (2017). Experimental adults were  
171 collected and sorted into fresh vials under light CO<sub>2</sub> anesthesia 10 - 12 d post-oviposition (within  
172 1 - 2 d of eclosion). These flies were held at 25°C, 12:12 L:D until 5 d-old to limit any carryover  
173 effects of CO<sub>2</sub> exposure (Nilson et al., 2006).

174

#### 175 *Experiment 1: Whole transcriptome response to low temperature*

176 To obtain a transcriptomic metric for how physiology changes during cold exposure and  
177 subsequent recovery under benign conditions, we sampled whole-body transcriptomes of third  
178 instar larvae and 5-day old adult *D. melanogaster* prior to, during, and after exposure to a cold  
179 temperature (Fig. 1A).

180

181 We crossed five male and five virgin female flies from each of six *Drosophila* Genetic Reference  
182 Panel (DGRP; Mackay et al. 2012; Huang et al. 2014) isogenic lines (Table S1) to produce  
183 offspring for use in this experiment. We initially chose these six lines in order to compare three  
184 lines exhibiting high cold tolerance in adults but not larvae, and three lines exhibiting high cold  
185 tolerance in larvae but not adults (Table S1; Freda et al. 2017). However, initial analyses  
186 revealed little evidence for transcriptomic variation tied to variance between these two classes of  
187 fly lines, with apparent phenotypic effects highly influenced by outlier lines (Fig. S1). Thus, we  
188 treated line (6 levels) as a fixed effect (random effects cannot be modeled using the methods that  
189 we applied), providing replication across genetic backgrounds, and did not model phenotypic  
190 effects in any of our subsequent analyses.

191

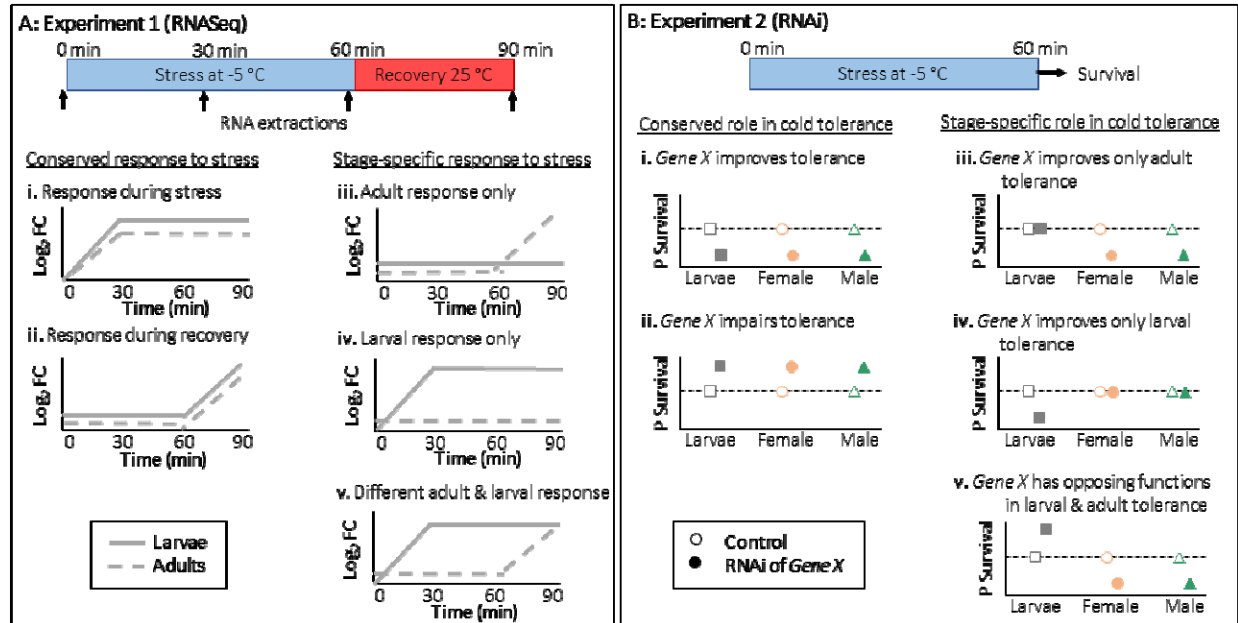

192  
 193 **Figure 1.** Summary of methods and example predictions for Experiments 1 and 2. Time courses  
 194 at the top of each column show sampling time points during the (A) RNAseq experiment or the  
 195 treatment prior to the measure of survival in the (B) RNAi line experiments. Panel A illustrates  
 196 predicted patterns of differentially-expressed genes in *Drosophila melanogaster* during and after  
 197 cold stress, with examples of (i, ii) larvae and adults exhibiting a conserved transcriptional  
 198 response to cold and (iii, iv, v) larvae and adults exhibiting different transcriptional responses to  
 199 cold. Predictions (log<sub>2</sub> fold change, FC) do not differentiate between up- and down-regulated  
 200 transcripts. Panel B illustrates predicted effects of target gene (*Gene X*) RNA interference  
 201 (RNAi) on the proportion of surviving *D. melanogaster* after cold stress compared to control  
 202 flies (no RNAi), with examples of the RNAi having a similar effect on cold tolerance of larvae,  
 203 female adults, and male adults (i, ii) and the RNAi having life stage-specific effects on cold  
 204 tolerance (iii, iv, v). We predict that knocking out a gene with a positive effect (improves cold  
 205 tolerance) decreases survival of RNAi lines, whereas knocking out a gene with a negative effect  
 206 (impairs tolerance) increases survival of RNAi lines.

207  
 208 Each experimental replicate consisted of 10 offspring (10 larvae or 5 male + 5 female adults). To  
 209 minimize stochastic, environmental effect, each replicate group of 10 offspring was  
 210 homogenized together to create pools for RNA sequencing. The vial flug (Genesee Scientific,  
 211 Catalog # 49-102) for each replicate was moistened with water to inhibit desiccation during and  
 212 after cold exposure. We took an initial sample at 25°C prior to cold exposure (time zero, t<sub>0</sub>), then  
 213 exposed all remaining replicates to -5°C by immediately immersing fly vials in a temperature-  
 214 controlled recirculating bath (ECO RE 2025, Lauda Corporation, Lauda-Königshofen,  
 215 Germany). We confirmed that vials rapidly reached test temperatures and that larval food did not  
 216 freeze during treatments (Freda et al., 2017) We then took samples at 30 and 60 minutes during



217 the cold exposure (t30 and t60, respectively). At 60 minutes all remaining vials were removed  
218 from the bath and placed back at 25°C, and one final sample was taken 30 minutes after this  
219 transfer (30 minutes of recovery, or 90 minutes total, t90). All samples were immediately snap-  
220 frozen in liquid N<sub>2</sub>, ground into Tri-reagent (Zymo Research, Irvine CA, USA), then frozen at -  
221 80°C until RNA purification. The overall experimental design included 6 lines by 2 stages by 4  
222 time points by 3 replicates, yielding 144 total samples.

223

#### 224 RNA extraction, library preparation, sequencing, and initial informatics

225 To extract RNA from DGRP lines for RNASeq, we homogenized each sample (pool of 10  
226 individuals) with a plastic micropestle in Tri-reagent (Zymo) and used the Zymo Direct-zol total  
227 RNA extraction kit according to manufacturer's instructions. We prepared our cDNA libraries  
228 using a RNA-tag sequencing approach, as described previously (Lohman et al., 2016). Resulting  
229 libraries were sequenced on 5 lanes as 100 bp single-end reads on an Illumina HiSeq 2500 at  
230 Kansas University's Genome Sequencing Core Laboratory, resulting in an average of 6 million  
231 reads per sample. The library size for each sample is available in Table S2. We used STAR  
232 (Dobin et al., 2013) to map reads to the *D. melanogaster* reference genome (version 6.06)  
233 obtained from FlyBase (Gramates et al., 2017), with >95% total mapped reads across all  
234 samples. Read counts per gene and per isoform were generated using RSEM (Li and Dewey,  
235 2011). After filtering out all gene models not covered by at least one read in 50% of samples, we  
236 retained 13,242 genes. Following normalization of read counts across libraries using the  
237 weighted trimmed mean of M-values (TMM) method (Robinson and Oshlack, 2010), we  
238 examined variation among libraries using a Multi-Dimensional Scaling (MDS) plot generated  
239 using the 500 genes with the highest root-mean-square log<sub>2</sub>-fold change among samples  
240 (Robinson et al., 2010). We removed 10 samples that were very clear outliers on the MDS plot  
241 (Fig. S2) and exhibited low read counts (less than 200,000 reads) compared to the median read  
242 count of 4,808,878 before outliers were removed (Table S2). After removing outliers, all stage ×  
243 time × line combinations were represented by at least two replicates (Table S3).

244

## 245 Statistical modelling of temperature- and stage-specific transcription

246 Our main goal in Experiment 1 was to quantify whether and how the transcriptional response to  
247 low temperatures varied between larval and adult life history stages. We expected that many  
248 transcripts would be differentially expressed (DE) between life stages because they have very  
249 distinct tissue compositions (Arbeitman et al., 2002). Thus, though we estimated gross life stage  
250 differences and other contrasts, the parameter of primary interest was a stage  $\times$  time interaction,  
251 indicating stage-specific thermal response during and/or after low temperature exposure (see Fig.  
252 1A for example predicted gene expression trajectories). Below, we detail nested, ad hoc model  
253 selection to best estimate that parameter and characterize thermal response trajectories for  
254 transcripts with stage-specific expression patterns. The code for this analysis is also publicly  
255 available (see Data Availability section). We recognize that transcripts/effects removed from  
256 these models may also be of interest, but they were not the focus of this study.

257  
258 We started with a full generalized linear model with binomial error fitted using the *edgeR*  
259 package (Robinson et al., 2010) in R (R Core Team, 2021) to predict the mean read count for  
260 each transcript, then removed effects and transcripts to estimate stage  $\times$  time (interaction) effects  
261 that did not depend on DGRP line. The full model included regression coefficients modelling the  
262 effects of *stage*, *time*, *line*, and all two-way interactions and the three-way interaction of these  
263 variables. Statistical inferences from this model identified 130 transcripts with a significant  
264 (FDR  $<$  0.05) three-way interaction term. We then removed all transcripts with significant three-  
265 way interactions, then fit a reduced model omitting the three-way interaction, which identified 19  
266 transcripts with a significant two-way interaction between *time* and *line*. We removed these  
267 transcripts, then fit our final, reduced model including all main effects plus the *stage*  $\times$  *time* and  
268 *stage*  $\times$  *line* two-way interactions.

269  
270 The transcripts of primary interest in our final, reduced model were those that either 1) had a  
271 significant main effect of *time* but no *stage*  $\times$  *time* interaction, or 2) had a significant *stage*  $\times$   
272 *time* interaction. The former are transcripts that respond to low temperature in similar ways in  
273 both life history stages, while the latter are transcripts that exhibit distinct responses to cold in  
274 larvae vs. adult flies. We used linear contrasts to estimate the trajectories of differential  
275 expression over time for all transcripts in both of these categories by estimating the log<sub>2</sub> fold

276 change between each time point relative to time zero ( $t_0$ ). This model also allowed us to identify  
277 transcripts that had a significant main effect of *stage* or a *stage*  $\times$  *line* interaction, but no *stage*  $\times$   
278 *time* interaction. These were not of primary interest, but allowed us to estimate how much of the  
279 transcriptome was differentially expressed between life history stages but not responsive to cold.  
280 Finally, we used the DAVID functional annotation tool (Huang et al., 2009a; Huang et al.,  
281 2009b) to identify functional categories enriched in the set of transcripts illustrating stage-  
282 specific responses to cold temperatures.

283

#### 284 Tests for the influence of tissue-specific gene expression

285 Transcriptomics from whole bodies are coarse measurements that ignore tissue-specificity of  
286 gene expression, and in this case differential expression in response to changing temperatures.  
287 However, they provide a comprehensive snapshot of whole-organism physiological responses.  
288 We could not directly assess how differences in tissue composition across stages might  
289 contribute to different transcriptomic responses without tissue-specific RNA libraries. Rather, we  
290 tested whether genes that exhibit high levels of tissue-specific expression in *D. melanogaster*  
291 were overrepresented in sets of transcripts that we identified as differentially expressed between  
292 life stages, or exhibiting stage-by-time interactions.

293

294 We quantified tissue specificity of *D. melanogaster* transcripts using data from FlyAtlas2  
295 (Leader et al., 2018) as described in (Cridland et al., 2020). We calculated  $\tau$  for each transcript, a  
296 value ranging from 0 to 1, with higher numbers associated with greater tissue-specificity (Yanai  
297 et al., 2005). As in (Cridland et al., 2020), if fragments per kilobase of transcript per million  
298 mapped reads (FPKM) for whole bodies was less than 2, we set it equal to 2 to avoid inflated  
299 estimates for genes with very low expression. We then calculated a normalized expression value  
300 for each tissue as the FPKM for that tissue divided by the FPKM for the whole body of the  
301 sex/life stage from which the tissue was derived. Finally, we calculated the tissue specificity  
302 index,  $\tau$ , as follows:

$$303 \quad \tau = \frac{\sum_{i=1}^N (1-x_i)}{N-1} (1)$$

304 Where  $x_i$  is the normalized expression value for the  $i^{\text{th}}$  tissue divided by the maximum  
305 normalized expression value across tissues and  $N$  is the number of tissues. We then calculated

306 the median  $\tau$  for a given set of transcripts, e.g., the set exhibiting significant stage-by-time  
307 interactions in the above generalized linear models. We compared that point estimate against the  
308 median  $\tau$  for 10,000 random samples with the same sample size as the tested set of transcripts to  
309 generate a permutation-based p-value.

310

### 311 *Experiment 2: RNAi to test stage-specific functional effects*

312 In order to functionally test whether genes can have stage-specific effects on cold tolerance, we  
313 compared the effect of knocking down target gene expression on survival of third instar larvae  
314 and 5 day-old adult females and males following a cold stress (Fig 1B). Gene knockdown was  
315 achieved using TRiP (Transgenic RNAi Project) lines (Table S1) as described in Teets and Hahn  
316 (2018). Briefly, five virgin females from each TRiP line carrying dsRNA under the control of a  
317 UAS promoter were crossed to five males of a driver line carrying the GAL4 gene under the  
318 control of an actin promoter to produce F<sub>1</sub> offspring for experiments. The GAL4 driver promotes  
319 expression of dsRNA in all tissues to knock down expression of the target gene in the F<sub>1</sub>  
320 generation. We measured survival of groups of 20 larvae or 20 adults (10 adult females and 10  
321 adult males) kept in single fly vials after a 60 min exposure to -5°C, with at least three replicates  
322 vials of each stage per line (Fig 1B). The cold treatment was chosen because 40 - 60% of control  
323 flies (no RNAi) survived this temperature, allowing us to detect effects of RNAi that either  
324 increased or decreased survival relative to the control.

325

326 We exposed flies to a -5°C cold stress by immersing vials of larvae and adults in a temperature-  
327 controlled Arctic A40 recirculating bath (ThermoFisher, Denver CO, USA) containing 50% (v/v)  
328 propylene glycol in water. The fly vials for larvae contained fresh medium, and larvae were  
329 allowed to burrow into the food prior to cold treatment via holes poked in the medium; the fly  
330 vials for adults were empty (Freda et al., 2017). We verified the temperature in vials using a 36-  
331 AWG type-T copper-constantan thermocouple (Omega Engineering, Norwalk CT, USA)  
332 interfaced with Picolog v6 software (Pico Technology, Cambridge, UK) via a Pico Technology  
333 TC-08 unit. After a 60 min exposure to -5°C, we returned groups of larvae or adult flies to 25°C,  
334 12:12 L:D to recover. Larvae recovered from cold exposure in the same vials and were  
335 monitored for adult eclosion over the next 10 d. We classified larval survivors as those that  
336 completed development and eclosed as adults (Freda et al., 2017). Adults recovered in small

337 petri dishes containing an approximately 1 cm<sup>3</sup> piece of fly food medium. We classified adult  
338 survivors as those that were motile (could walk/fly independently) 24 h post-cold stress (Jakobs  
339 et al., 2015).

340

#### 341 Fly lines

342 Experiment 2 included 11 TRiP lines (Table S1) whose cold tolerance in adult females has  
343 previously been characterized: two control (non-RNAi) lines and nine lines that each knocked  
344 down expression of a target gene (Teets and Hahn, 2018). We reasoned that these genes  
345 previously had observable effects on adult cold responses, and thus would provide an appropriate  
346 test for whether those responses carry over to other life history stages. Two control lines were  
347 required because the dsRNA insertion site (and therefore the genetic background) differed  
348 among RNAi lines: four lines (+ one control) had an attP2 insertion site, while five lines (+ one  
349 control) had an attP40 insertion site (Table S1). Originally, we also planned on knocking out  
350 genes identified as having universal or stage-specific responses to cold in Experiment 1, but  
351 these experiments were truncated by lab closures during the coronavirus pandemic of 2020.

352

#### 353 Statistical analysis

354 For each of the nine target genes in Experiment 2 (Table S1), we compared the survival post-  
355 cold stress of RNAi and control flies with the same genetic background (attP2 or attP40 insertion  
356 sites). We used the *nlme* function in the *lme4* package in R (Bates et al., 2014) to fit generalized  
357 linear mixed models with binomial error and a logit link function. We modelled survival as a  
358 function of the fixed effects of line (control/RNAi), stage (larvae/adult female/adult male), and  
359 their interaction and random (subject level) effects of vial. Example predictions for the effect of  
360 RNAi on survival for genes with stage-specific function are in Fig. 1B.

361

## 362 **Results**

### 363 *Differential gene expression in response to cold is largely stage-specific*

364 A large number of transcripts were significantly (FDR < 0.05) differentially expressed between  
365 larval and adult life stages regardless of time sampled during cold treatment (n=10,966, Fig. 2).

366 A smaller, but still sizeable number of transcripts changed in abundance over time. However,

367 only 21 transcripts changed in a similar pattern in both life stages (significant main effect of  
368 time, no *stage* × *time* interaction), while the bulk of the temperature-sensitive transcripts  
369 changed over time in a stage-specific manner (n=880 with significant *stage* × *time* interaction).

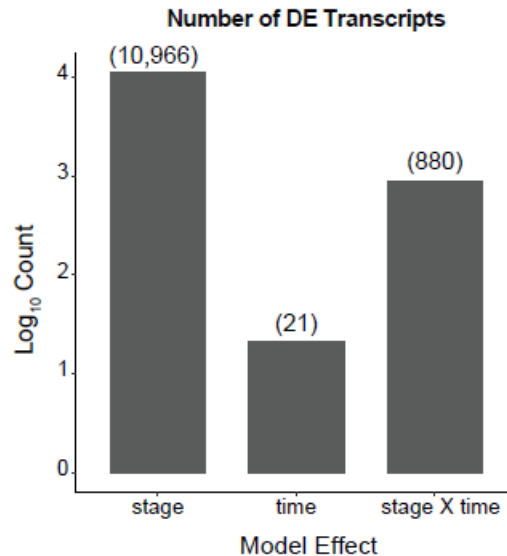

370

371 **Figure 2.** Number of transcripts demonstrating significant (FDR < 0.05) effects of *stage* (larva or  
372 adult), *time* (t0, t30, t60, t90), or a *stage* × *time* interaction during and after cold stress in *D.*  
373 *melanogaster*. The y-axis is log<sub>10</sub> scaled; actual counts are reported above each bar.

374

375 Patterns of change over time were also distinct between life stages. Using linear contrasts, we  
376 identified many more transcripts that were significantly DE across at least one time point in  
377 larvae (n=763) compared to adults (n=121). Subdividing these into transcripts up-regulated or  
378 down-regulated over time on average revealed that most cold-sensitive transcripts in larvae were  
379 up- or down-regulated during the cold exposure and remained at similar levels during recovery  
380 (Fig. 3A). In contrast, far fewer transcripts were cold-sensitive in adults, and these were mainly  
381 up-regulated only during recovery, as has been observed following both cold and heat exposure  
382 in other studies of *D. melanogaster* adults (Colinet et al., 2010a; Sinclair et al., 2007; Sørensen et  
383 al., 2005; Fig. 3B). Transcripts that changed significantly over time in larvae did not change over  
384 time in adults (Fig. 3A; Adult trajectories remain flat). Transcripts significantly up-regulated  
385 over time in adults did tend to be up-regulated in larvae as well (Fig. 3B). However, those larval  
386 expression trajectories did not demonstrate the same, pronounced up-regulation during recovery  
387 observed in adults. The small number of transcripts (n = 21) with significant main effects of *time*

388 but no *stage* × *time* interaction were up-regulated over time in various patterns during cold  
389 exposure and recovery (Fig. S3).  
390

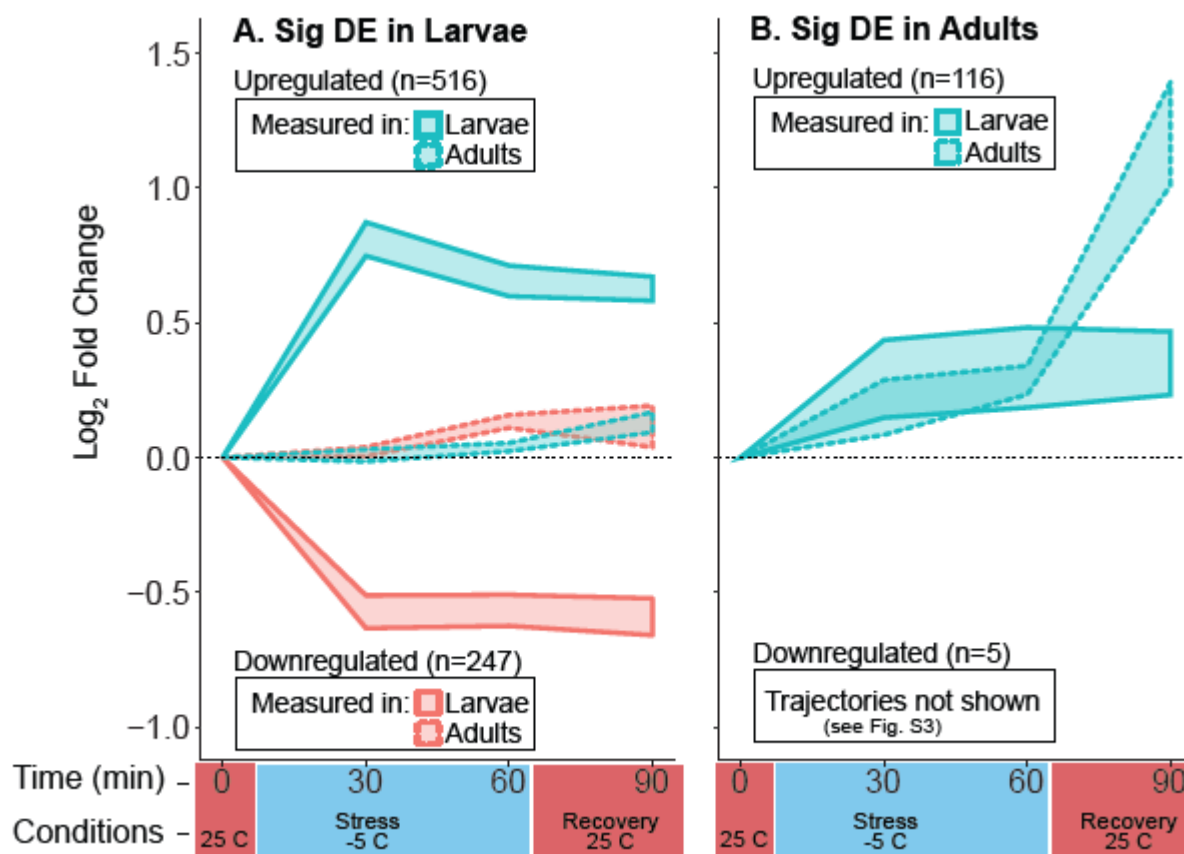

391  
392 **Figure 3.** Trajectories of differential expression (DE) during and after cold exposure for the  
393 group of transcripts with significant ( $FDR < 0.05$ ) DE across at least two time points in *D.*  
394 *melanogaster* (A) larvae or (B) adults. For comparison, the same transcripts measured in larvae  
395 (solid borders) and adults (dashed borders) are plotted. Blue indicates transcripts significantly  
396 up-regulated on average in (A) larvae or (B) adults, while pink indicates transcripts down-  
397 regulated on average in those respective life stages. Y-axis values are  $\log_2$  fold changes at each  
398 time point relative to the first ( $t_0$ ) time point. Shaded regions are 95% confidence intervals (c.i.)  
399 for each group of transcripts designated in the legends. For example, the blue shaded region with  
400 a solid boundary in (A) represents 516 transcripts significantly up-regulated (on average) in  
401 larvae, while the blue shaded region with a dashed boundary represents those same transcripts  
402 measured in adults. Darker red and blue on the x-axis denote the temperature at which  
403 individuals were sampled over the time course.  
404

405 Closer examination of genes in several functional categories identify candidate mechanisms  
406 underlying the cold response that are also stage-specific. Functional enrichment analysis of the

407 763 and 121 gene significantly differentially expressed over time in larvae and adults,  
408 respectively, and with significant *stage* × *time* interactions identified many overrepresented  
409 (FDR < 0.05) functional categories (including Uniprot keyword searches – UPK; Gene Ontology  
410 groups – GO; Interpro protein domains – INTERPRO; and Kyoto Encyclopedia of Genes and  
411 Genomes pathways – KEGG; Table S4). Below we focus on members of select categories  
412 enriched in either larvae (GO Autophagy, INTERPRO Basic leucine zipper, KEGG Fatty Acid  
413 metabolism), adults (UPK Stress response), or both (GO Response to bacterium).

414

415 Transcripts participating in autophagy, often involved in clearance of cellular damage and  
416 nutrient recycling during energy stress (Kroemer et al., 2010), were mainly up-regulated during  
417 and after cold exposure in larvae (Fig. 4A). Transcripts with basic leucine zipper domains,  
418 largely transcription factors playing roles in developmental regulation, exhibited similar patterns  
419 in larvae (Fig. 4B). Transcripts participating in fatty acid metabolism, potentially influencing  
420 lipid metabolism or temperature-induced changes in membrane fluidity (Clark and Worland,  
421 2008; Košťál, 2010) were mainly down-regulated during and after cold exposure in larvae (Fig.  
422 4C). All of the transcripts in these three functional categories demonstrated little change during  
423 and after cold exposure in adult flies. In contrast, transcripts associated with stress response,  
424 mainly chaperonins, exhibited the most pronounced changes only during recovery in adults (Fig.  
425 4D). Though some of these transcripts also changed over time in larvae, many were down-  
426 regulated, including multiple copies of the well-known, temperature-inducible stress response  
427 gene Hsp70.

428

429



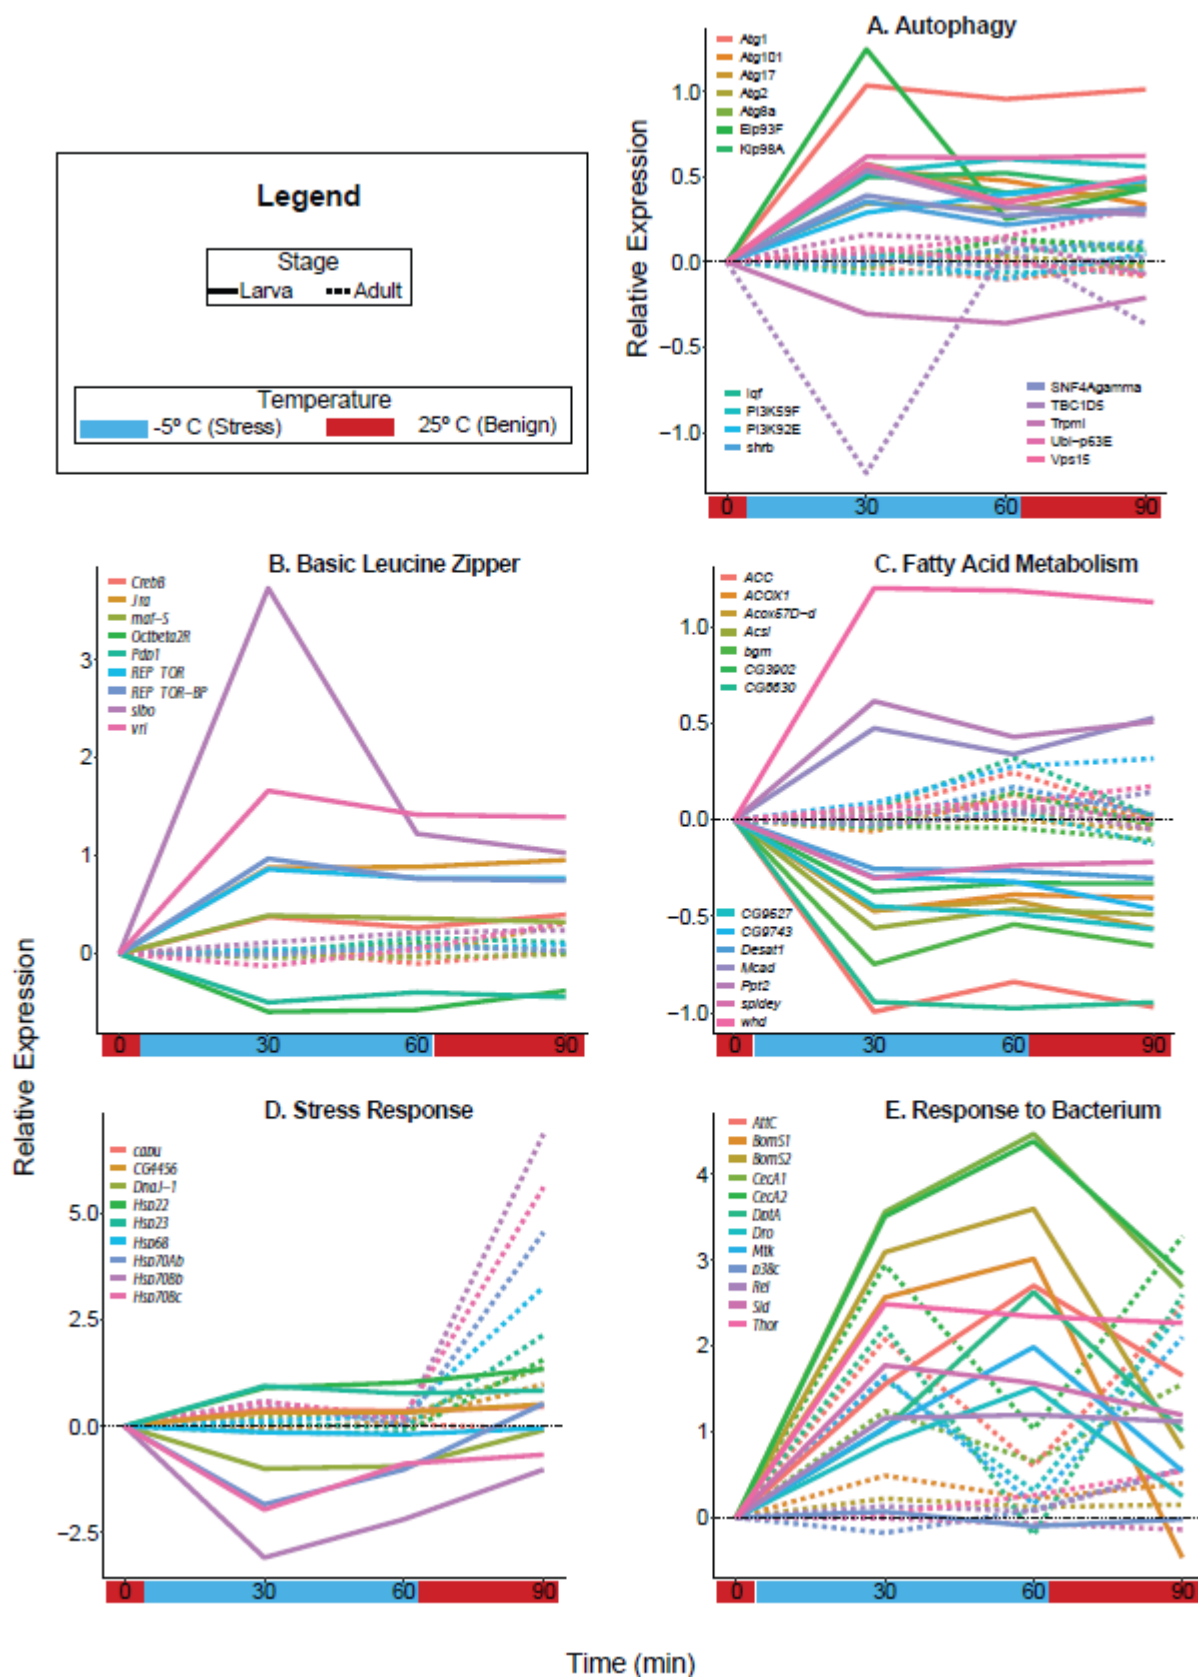

430

431 **Figure 4 (previous page).** Trajectories of differential expression during (t30, t60) and after (t90)  
432 cold exposure for transcripts in select functional categories enriched in the set of all transcripts  
433 significantly differentially expressed across at least two time points in *D. melanogaster* larvae or  
434 adults. Y-axis values are  $\log_2$  fold changes at each time point relative to the first (t0).  
435

436 Like transcripts in the stress response category, some transcripts associated with the immune  
437 response (within the Response to Bacterium GO group) responded to cold in larvae and adults,  
438 though again demonstrating stage-specific patterns (Fig. 4E). The immune response has  
439 previously been implicated in responses to thermal extremes in insects (Ferguson et al., 2018;  
440 Salehipour-shirazi et al., 2017; Sinclair et al., 2013). All but one transcript in the category were  
441 substantially up-regulated during cold exposure in larvae, but tended to decrease in relative  
442 abundance during recovery. In adults, transcripts for *Attacin-C* (*AttC*), two Cecropins (*CecA1*,  
443 and *CecA2*), *Diptericin A* (*DptA*), and *Metchnikowin* (*Mtk*) were up-regulated at 30 minutes  
444 during cold exposure, down-regulated by 60 minutes, then up-regulated again during recovery.  
445 One additional Cecropin (*CecC*) was up-regulated over time in a similar pattern for larvae versus  
446 adults (main effect of *time* but no *stage*  $\times$  *time* interaction; Fig. S3).

447  
448 *Differential expression is unrelated to tissue specificity*

449 We found no evidence that transcripts differentially expressed between whole-body extracts  
450 from different stages tended to be more tissue specific. Rather, we found a slight tendency for  
451 that set of transcripts to exhibit less tissue specificity than chance expectations. The median  $\tau$  for  
452 the set of 10,931 transcripts with stage or stage-by-line effects (FDR < 0.05) was 0.88, and we  
453 did not observe a value this small in 10,000 random samples of 10,931 transcripts (median  $\tau$  of  
454 random samples = 0.90;  $p < 0.0001$ ).

455  
456 Similarly, we found no evidence that transcripts with *stage*  $\times$  *time* interactions (different  
457 responses to the temperature treatments across stages) tended to be more tissue specific. The  
458 median  $\tau$  for the set of 849 transcripts with *stage*  $\times$  *time* effects (FDR < 0.05) was 0.82, and we  
459 did not observe a value this small in 10,000 random samples of 849 transcripts (median  $\tau$  of  
460 random samples = 0.90;  $p < 0.0001$ ).

461

462 *Some knockdowns had stage-specific effects, but none had consistent cross-stage effects*

463 We observed that the effect of RNAi of target genes on cold tolerance could be stage-specific,  
464 although this effect was not universal and was complicated by sex. Three genes of the nine genes  
465 tested in this study exhibited clear stage-specific effects of RNAi on cold hardiness (Fig. 5, Table  
466 S5). Knockdown of *CG10505* or *Clk* decreased adult, but not larval, survival relative to control  
467 flies after a cold stress, suggesting these two genes are important for adult cold tolerance only.  
468 Conversely, knockdown of *Ir85a* decreased larval, but not adult, survival, suggesting this gene is  
469 important for larval cold tolerance only. RNAi of three other genes had both stage- and sex-  
470 specific effects on cold hardiness (Fig. 5, Table S5). *klu* knockdown only increased female adult  
471 survival, but had no effect on larvae or male adults. *CG32533* or *mthl15* knockdown had  
472 opposite effects on larvae (low survival) and adults (high survival) of one sex only – either  
473 female (*CG32533*) or male (*mthl15*). The expression of these two genes therefore seems  
474 important for larval cold tolerance but detrimental to either female or male adult cold tolerance.  
475 We observed no significant effect of RNAi on cold hardiness for the remaining three genes (*NtR*,  
476 *pigs*, *psh*), although *pigs* and *psh* trended toward stage-specific effects (Fig. 5, Table S5).

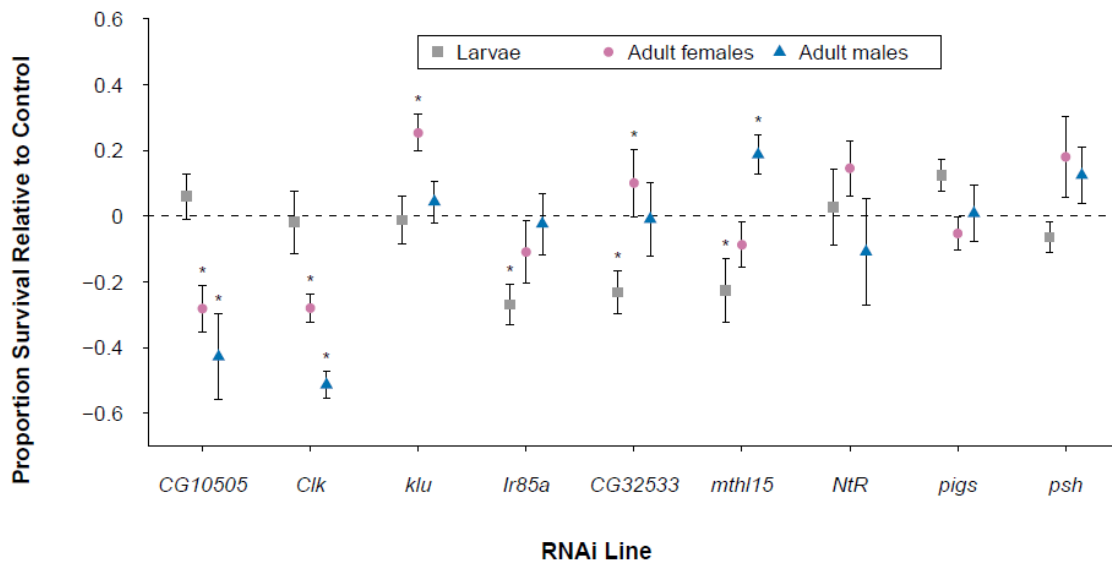

477

478 **Figure 5.** Proportion survival of *D. melanogaster* larvae and adults from lines with RNAi of  
479 target gene relative to control lines (no RNAi) following 1 h cold shock at -5°C. Each point  
480 represents the mean proportion survival of the RNAi line minus the mean proportion survival of  
481 the appropriate control line. Error bars indicate s.e.m., calculated from the proportion survival of  
482 three or more replicates of 20 (larvae) or 10 (adult female or male) RNAi individuals. Asterisks  
483 indicate a significant effect of RNAi on proportion survival for larvae, adult females, or adult  
484 males, based on logistic regressions (Table S4).

485

## 486 **Discussion**

487 *Cold tolerance physiology is largely distinct across metamorphosis*

488 Our results generally support the ‘developmentally distinct physiology’ hypothesis, showing that  
489 both the expression and function of genes pertinent to cold hardiness differ dramatically across  
490 development in *D. melanogaster*. Transcriptional responses to cold in larvae and adults differed  
491 in timing (during vs. after cold stress), magnitude (many more DE transcripts in larvae), and  
492 constituent genes. In addition, of the nine genes whose expression we knocked down via RNAi,  
493 most of them (six) affected adult and larval cold hardiness differently. Though differences in  
494 tissue composition across life stages probably have some influence on transcriptional responses  
495 to cold, they do not appear to account for the majority of whole-organism transcriptional  
496 differences in the thermal response across stages. Other studies have demonstrated  
497 transcriptional differences across stages in a complex life cycle (Arbeitman et al., 2002;  
498 Chevalier et al., 2006; Sanil et al., 2014; Strode et al., 2006), but this is the first study to our  
499 knowledge that demonstrates distinct transcriptome-wide environmental responses across life  
500 stages, with additional support from functional genetics experiments.

501

502 Although classic CSR genes (e.g. heat shock proteins; HSPs) were not similarly regulated in  
503 response to cold in both adults and larvae, we had minor support for the ‘developmentally  
504 conserved physiology’ hypothesis based on transcription of immune response genes. Immunity-  
505 related genes have been identified as cold-responsive in a number of other studies of adult  
506 drosophilid flies (MacMillan et al., 2016; Sinclair et al., 2013; Vermeulen et al., 2013). However,  
507 to our knowledge this is the first study to find similar results in adults and larvae, both of which  
508 upregulated antimicrobial genes. The function of immunity genes in cold-mediated responses  
509 remains unknown, though Vermeulen et al. (2013) suggest that some constituent genes may play  
510 a role in repair of cellular damage through their known effects on wound healing. The  
511 consistency with which these genes are observed in cold responses across species (Cheng et al.,  
512 2017; Salehipour-shirazi et al., 2017; Su et al., 2019; Sun et al., 2019), and here across stages,  
513 suggests that they play a specific role in cold physiology, and are not just a general stress  
514 response *a la* the CSR.

515

516 Though some changes in transcription in response to environmental stress undoubtedly have  
517 important, adaptive benefits (Chen et al., 2018; Feder, 1999; Feder and Hofmann, 1999; Feder  
518 and Krebs, 1998), differences in baseline (unperturbed) physiology may be equally important. In  
519 particular, organisms may have higher fitness when exposed to stress because they are  
520 physiologically better prepared prior to stress exposure (Hercus et al., 2003; Krebs and  
521 Loeschcke, 1994). To be sure, we have shown that many transcripts differ in expression between  
522 stages in benign (baseline) conditions, but this largely reflects the massive developmental  
523 differences between the stages. These data do not allow us to identify which of these differences  
524 might contribute to differences in expression during and after stress, or to whole organism  
525 performance in response to stress, for that matter. However, to the extent that baseline  
526 transcriptomes heavily influence transcriptomic responses to a stressor, this still implies that  
527 (baseline) physiology affecting cold performance is distinct between life stages.

528

529 *Cold hardiness is associated with a muted transcriptional response to cold*

530 Differences between life stages in transcriptomic responses to cold stress likely reflect  
531 differences in cold stress resistance between stages. Though not definitively established, a  
532 relatively clear pattern is emerging from transcriptomic studies: species or populations that are  
533 the most stress resistant are also the least transcriptomically-responsive to environmental  
534 stressors. Or, more generally, species or populations that more frequently encounter a given  
535 environment tend to have more muted transcriptomic responses to that environment. This is true  
536 for Trinidadian guppies responding to predator cues (Ghalambor et al., 2015), fruit-feeding flies  
537 responding to different host fruits (Ragland et al., 2015), and marine invertebrates (Lockwood et  
538 al., 2010; Schoville et al., 2012), rice plants (Zhang et al., 2012), and other drosophilid flies  
539 (Königer and Grath, 2018; Parker et al., 2015) responding to thermal stressors. Adult *D.*  
540 *melanogaster* survive cold stressors better than larvae (Freda et al., 2017; Jensen et al., 2007),  
541 and we observed relatively few cold-sensitive transcripts in adults in this study. Moreover, the  
542 identity of transcripts involved in the larval transcriptomic response suggest more severe cold-  
543 induced damage in larvae compared to adults. Larvae differentially expressed autophagy genes  
544 during cold stress, suggesting that larvae need to mitigate cellular damage (i.e. degrade damaged  
545 cellular components; Kroemer et al., 2010) or to redistribute macromolecules and energy needed

546 for cell differentiation or growth (Neufeld, 2012; Wang and Levine, 2010). In contrast, adults did  
547 not upregulate autophagy-related transcripts and mainly upregulated chaperonins during  
548 recovery to preserve cellular function rather than clearing highly damaged cells (Colinet et al.,  
549 2010a; Frydenberg et al., 2003; Košťál and Tollarová-Borovanská, 2009). We note that *D.*  
550 *melanogaster* larvae are not susceptible to all stressors; they are more heat-tolerant than adults  
551 (Freda et al., 2019), likely because they feed in fruits that can become substantially hotter than  
552 air temperatures experienced by adults (Feder et al., 1997). We therefore do not think larvae are  
553 more cold-susceptible simply because they are undergoing rapid cellular growth, division, and  
554 differentiation compared to adults. Rather, it would appear that each stage has adapted to  
555 opposing thermal extremes: heat in larvae and cold in adults.

556

#### 557 *Transcriptomic time course and constituent genes differ across life stage*

558 Larvae rapidly differentially regulated a relatively large number of transcripts both during and  
559 following cold exposure. These changes likely include active regulation in response to cellular  
560 damage, as evidenced by the aforementioned autophagy response. We also observed differential  
561 regulation of lipid metabolism in larvae. Fatty acids are important in energy storage (as part of  
562 triacylglycerides) and membrane fluidity (as part of phospholipids) (Denlinger and Lee, 2010).  
563 Larvae downregulated several desaturases (e.g. *Desat1*, *CG8630*, *CG9743*), suggesting that they  
564 are not increasing the abundance of unsaturated fatty acids in phospholipids to maintain  
565 membrane fluidity at low temperatures (Ohtsu et al., 1998; Overgaard et al., 2005). However, the  
566 downregulation of several enzymes associated with fatty acid catabolism (e.g. *ACOX1*) and  
567 synthesis (e.g. *ACC*, *acsl*, *bgm*) is consistent with restructuring of lipid metabolism to potentially  
568 support growth or recovery from stress (Sinclair and Marshall, 2018).

569

570 In contrast, adults had relatively muted transcriptomic responses during cold exposure, with a  
571 limited (in number of transcripts) but robust (in the degree of differential expression) response  
572 during recovery. The best-characterized gene expression response to temperature stress, hot or  
573 cold, is upregulation of Hsps and other chaperonins during recovery after exposure to a stressor  
574 (Colinet et al., 2010b; Philip and Lee, 2010; Yocum, 2001). This was the most prominent adult  
575 response in our study as well, with no detectable changes in Hsp expression during cold  
576 exposure. As mentioned above, it is likely that the relative stability of gene expression during

577 stress in adults reflects less severe perturbations from homeostasis and more restricted cellular  
578 damage.

579

### 580 *Implications for genetic decoupling across development*

581 Though the transcriptome is only one metric of physiology, the scale of the differences across  
582 stages in this study suggests that allelic variants in many genes could strongly affect  
583 environmental sensitivity of one stage, while having little effect on other stages. Our results are  
584 entirely consistent with empirical studies that repeatedly show little to no genetic correlation in  
585 environmental (thermal) sensitivity across metamorphosis in insects (Dierks et al., 2012; Freda et  
586 al., 2017; Freda et al., 2019; Gilchrist et al., 1997; Loeschcke and Krebs, 1996; Tucić, 1979). In  
587 combination, these results suggest that strong genetic decoupling of environmental sensitivity is  
588 relatively common for organisms with complex life cycles, likely facilitating  
589 adaptation/acclimation of different life stages to different thermal environments.

590

591 Being so widespread, differences in stage-specific thermal tolerance might not appear so  
592 surprising. However, temperature is fundamental to limiting species' spatial distributions (Bale,  
593 2002; Bale et al., 2002), and thus thermal performance must be constrained in some ways.

594 Though the results of our RNAi knockout experiments suggest that cross-stage pleiotropy for  
595 environmental sensitivity is not widespread, we expect that such pleiotropy exists, and will  
596 constrain the limits of thermal flexibility across life stages. For example, genetic modifications to  
597 increase Hsp70 copy number (and subsequently expression) affected both larval and adult  
598 thermal tolerance in *D. melanogaster* (Krebs and Bettencourt, 1999). In that instance, the genetic  
599 differences between modified and non-modified lines was relatively extreme (12 extra gene  
600 copies). However, there is some evidence for cross-stage effects of naturally segregating genetic  
601 variants in plants. Quantitative Trait Locus (QTL) studies in rice have identified QTL associated  
602 with cold tolerance at multiple developmental stages, though most QTL only affect a single  
603 developmental stage (Yang et al., 2020).

604

605 Given the polygenic architecture of environmental tolerance in general (Healy et al., 2018) and  
606 thermal tolerance specifically (Barghi et al., 2019; Freda et al., 2017; Sanghera et al., 2011), it's  
607 unlikely that further, detailed analysis of single-locus pleiotropy will fully address questions

608 about the limits of stage-independent adaptations to environmental stressors. Rather, comparative  
609 studies leveraging existing variation in stage-specific adaptation or selection studies generating  
610 relevant phenotypic variation would seem to be the most promising avenues for further research.

611

612

### 613 **Acknowledgements**

614 The authors would like to thank Maizey Funk and Lahari Gadey for help with *D. melanogaster*  
615 rearing, and the ant-fly-beetle group at CU Denver for comments on earlier versions of the  
616 manuscript.

617

### 618 **Competing Interests**

619 The authors have no competing interests to declare.

620

### 621 **Funding**

622 This work was supported by National Science Foundation grants IOS 1700773 to GJR, DBI  
623 1460802 to TJM], and the Kansas State University Department of Entomology. This material is  
624 based upon work supported by (while serving at) the National Science Foundation. Any opinion,  
625 findings, and conclusions or recommendations expressed in this material are those of the  
626 author(s) and do not necessarily reflect the views of the National Science Foundation.

627

### 628 **Data Availability**

629 All raw transcriptomic datasets from this study are available in NCBI BioProject PRJNA783562  
630 (currently embargoed). All code and other data not include in the supplement are available at  
631 <https://github.com/gjragland/Stage-specific-expression>.

632

### 633 **References [Updated]**

634 **Arbeitman, M. N., Furlong, E. E. M., Imam, F., Johnson, E., Null, B. H., Baker, B. S.,**  
635 **Krasnow, M. A., Scott, M. P., Davis, R. W. and White, K. P.** (2002). Gene expression  
636 during the life cycle of *Drosophila melanogaster*. *Science* **297**, 2270–2275.



- 637 **Bale, J. S.** (2002). Insects and low temperatures: from molecular biology to distributions and  
638 abundance. *Phil. Trans. R. Soc. Lond., B, Biol. Sci.* **357**, 849–862.
- 639 **Bale, J. S., Masters, G. J., Hodkinson, I. D., Awmack, C., Bezemer, T. M., Brown, V. K.,  
640 Butterfield, J., Buse, A., Coulson, J. C., Farrar, J., et al.** (2002). Herbivory in global  
641 climate change research: direct effects of rising temperature on insect herbivores. *Glob.  
642 Change Biol.* **8**, 1–16.
- 643 **Barghi, N., Tobler, R., Nolte, V., Jakšić, A. M., Mallard, F., Otte, K. A., Dolezal, M., Taus,  
644 T., Kofler, R. and Schlötterer, C.** (2019). Genetic redundancy fuels polygenic  
645 adaptation in *Drosophila*. *PLoS Biol.* **17**, e3000128.
- 646 **Bates, D., Mächler, M., Bolker, B. and Walker, S.** (2014). Fitting linear mixed-effects models  
647 using lme4. *arXiv:1406.5823*.
- 648  
649 **Bowler, K. and Terblanche, J. S.** (2008). Insect thermal tolerance: what is the role of ontogeny,  
650 ageing and senescence? *Biol. Rev.* **83**, 339–355.
- 651 **Chen, B., Feder, M. E. and Kang, L.** (2018). Evolution of heat-shock protein expression  
652 underlying adaptive responses to environmental stress. *Mol. Ecol.* **27**, 3040–3054.
- 653 **Cheng, C.-H., Ye, C.-X., Guo, Z.-X. and Wang, A.-L.** (2017). Immune and physiological  
654 responses of pufferfish (*Takifugu obscurus*) under cold stress. *Fish Shellfish Immunol.* **64**,  
655 137–145.
- 656 **Chevalier, S., Martin, A., Leclère, L., Amiel, A. and Houliston, E.** (2006). Polarised  
657 expression of *FoxB* and *FoxQ2* genes during development of the hydrozoan *Clytia*  
658 *hemisphaerica*. *Dev. Genes Evol.* **216**, 709–720.
- 659 **Clark, M. S. and Worland, M. R.** (2008). How insects survive the cold: molecular  
660 mechanisms—a review. *J. Comp. Physiol. B* **178**, 917–933.

- 661 **Colinet, H., Lee, S. F. and Hoffmann, A.** (2010a). Temporal expression of heat shock genes  
662 during cold stress and recovery from chill coma in adult *Drosophila melanogaster*. *FEBS*  
663 *J.* **277**, 174–185.
- 664 **Colinet, H., Lee, S. F. and Hoffmann, A.** (2010b). Knocking down expression of *Hsp22* and  
665 *Hsp23* by RNA interference affects recovery from chill coma in *Drosophila*  
666 *melanogaster*. *J. Exp. Biol.* **213**, 4146–4150.
- 667 **Cridland, J. M., Majane, A. C., Sheehy, H. K. and Begun, D. J.** (2020). Polymorphism and  
668 divergence of novel gene expression patterns in *Drosophila melanogaster*. *Genetics* **216**,  
669 79–93.
- 670 **Denlinger, D. L. and Lee, J., Richard E. eds.** (2010). *Low Temperature Biology of Insects*.  
671 Cambridge: Cambridge University Press.
- 672 **Dierks, A., Kölzow, N., Franke, K. and Fischer, K.** (2012). Does selection on increased cold  
673 tolerance in the adult stage confer resistance throughout development? *J. Evol. Biol.* **25**,  
674 1650–1657.
- 675 **Dobin, A., Davis, C. A., Schlesinger, F., Drenkow, J., Zaleski, C., Jha, S., Batut, P.,**  
676 **Chaisson, M. and Gingeras, T. R.** (2013). STAR: ultrafast universal RNA-seq aligner.  
677 *Bioinformatics* **29**, 15–21.
- 678 **Feder, M. E.** (1999). Organismal, ecological, and evolutionary aspects of Heat-Shock Proteins  
679 and the stress response: established conclusions and unresolved issues. *Am. Zool.* **39**,  
680 857–864.
- 681 **Feder, M. E. and Hofmann, G. E.** (1999). Heat-shock proteins, molecular chaperones, and the  
682 stress response: evolutionary and ecological physiology. *Annu. Rev. Physiol.* **61**, 243–  
683 282.

- 684 **Feder, M. E. and Krebs, R. A.** (1998). Natural and genetic engineering of the Heat-Shock  
685 Protein Hsp70 in *Drosophila melanogaster*: consequences for thermotolerance. *Am. Zool.*  
686 **38**, 503–517.
- 687 **Feder, M. E., Blair, N. and Figueras, H.** (1997). Natural thermal stress and heat-shock protein  
688 expression in *Drosophila* larvae and pupae. *Funct. Ecol.* **11**, 90–100.
- 689 **Ferguson, L. V., Kortet, R. and Sinclair, B. J.** (2018). Eco-immunology in the cold: the role of  
690 immunity in shaping the overwintering survival of ectotherms. *J. Exp. Biol.* **221**,  
691 jeb163873.
- 692 **Freda, P. J., Alex, J. T., Morgan, T. J. and Ragland, G. J.** (2017). Genetic decoupling of  
693 thermal hardiness across metamorphosis in *Drosophila melanogaster*. *Integr. Comp. Biol.*  
694 **57**, 999–1009.
- 695 **Freda, P. J., Ali, Z. M., Heter, N., Ragland, G. J. and Morgan, T. J.** (2019). Stage-specific  
696 genotype-by-environment interactions for cold and heat hardiness in *Drosophila*  
697 *melanogaster*. *Heredity* **123**, 479–491.
- 698 **Frydenberg, J., Hoffmann, A. A. and Loeschcke, V.** (2003). DNA sequence variation and  
699 latitudinal associations in *hsp23*, *hsp26* and *hsp27* from natural populations of  
700 *Drosophila melanogaster*. *Mol. Ecol.* **12**, 2025–2032.
- 701 **Ghalambor, C. K., Hoke, K. L., Ruell, E. W., Fischer, E. K., Reznick, D. N. and Hughes, K.**  
702 **A.** (2015). Non-adaptive plasticity potentiates rapid adaptive evolution of gene  
703 expression in nature. *Nature* **525**, 372–375.
- 704 **Gilchrist, G. W., Huey, R. B. and Partridge, L.** (1997). Thermal sensitivity of *Drosophila*  
705 *melanogaster*: evolutionary responses of adults and eggs to laboratory natural selection at  
706 different temperatures. *Physiol. Zool.* **70**, 403–414.

- 707 **Gramates, L. S., Marygold, S. J., Santos, G. dos, Urbano, J.-M., Antonazzo, G., Matthews,**  
708 **B. B., Rey, A. J., Tabone, C. J., Crosby, M. A., Emmert, D. B., et al.** (2017). FlyBase  
709 at 25: looking to the future. *Nucleic Acids Res.* **45**, D663–D671.
- 710 **Haldane, J. B. S.** (1932). The time of action of genes, and its bearing on some evolutionary  
711 problems. *Am. Nat.* **66**, 5–24.
- 712 **Healy, T. M., Brennan, R. S., Whitehead, A. and Schulte, P. M.** (2018). Tolerance traits  
713 related to climate change resilience are independent and polygenic. *Glob. Chang. Biol.*  
714 **24**, 5348–5360.
- 715 **Hercus, M. J., Loeschke, V. and Rattan, S. I. S.** (2003). Lifespan extension of *Drosophila*  
716 *melanogaster* through hormesis by repeated mild heat stress. *Biogerontology* **4**, 149–156.
- 717 **Herrig, D. K., Vertacnik, K. L., Kohrs, A. R. and Linnen, C. R.** (2021). Support for the  
718 adaptive decoupling hypothesis from whole-transcriptome profiles of a  
719 hypermetamorphic and sexually dimorphic insect, *Neodiprion lecontei*. *Mol. Ecol.* **00**, 1–  
720 16.
- 721 **Huang, D. W., Sherman, B. T. and Lempicki, R. A.** (2009a). Systematic and integrative  
722 analysis of large gene lists using DAVID bioinformatics resources. *Nat. Protoc.* **4**, 44–57.
- 723 **Huang, D. W., Sherman, B. T. and Lempicki, R. A.** (2009b). Bioinformatics enrichment tools:  
724 paths toward the comprehensive functional analysis of large gene lists. *Nucleic Acids Res.*  
725 **37**, 1–13.
- 726 **Jakobs, R., Garipey, T. D. and Sinclair, B. J.** (2015). Adult plasticity of cold tolerance in a  
727 continental-temperate population of *Drosophila suzukii*. *J. Insect Physiol.* **79**, 1–9.

- 728 **Jensen, D., Overgaard, J. and Sørensen, J. G.** (2007). The influence of developmental stage  
729 on cold shock resistance and ability to cold-harden in *Drosophila melanogaster*. *J. Insect*  
730 *Physiol.* **53**, 179–186.
- 731 **Kingsolver, J. G., Arthur Woods, H., Buckley, L. B., Potter, K. A., MacLean, H. J. and**  
732 **Higgins, J. K.** (2011). Complex life cycles and the responses of insects to climate  
733 change. *Integr. Comp. Biol.* **51**, 719–732.
- 734 **Klockmann, M., Günter, F. and Fischer, K.** (2017). Heat resistance throughout ontogeny:  
735 body size constrains thermal tolerance. *Glob. Chang. Biol.* **23**, 686–696.
- 736 **Königer, A. and Grath, S.** (2018). Transcriptome analysis reveals candidate genes for cold  
737 tolerance in *Drosophila ananassae*. *Genes* **9**, 624.
- 738 **Košťál, V.** (2010). Cell structural modifications in insects at low temperatures. In *Low*  
739 *temperature biology of insects* (ed. Denlinger, D. L.) and Lee, R. J.), pp. 116–140.  
740 Cambridge: Cambridge University Press.
- 741 **Košťál, V. and Tollarová-Borovanská, M.** (2009). The 70 kDa Heat Shock Protein assists  
742 during the repair of chilling injury in the insect, *Pyrrhocoris apterus*. *PLOS ONE* **4**,  
743 e4546.
- 744 **Krebs, R. A. and Bettencourt, B. R.** (1999). Evolution of thermotolerance and variation in the  
745 Heat Shock Protein, Hsp701. *Am. Zool.* **39**, 910–919.
- 746 **Krebs, R. A. and Loeschcke, V.** (1994). Effects of exposure to short-term heat stress on fitness  
747 components in *Drosophila melanogaster*. *J. Evol. Biol.* **7**, 39–49.
- 748 **Krebs, R. A. and Loeschcke, V.** (1995). Resistance to thermal stress in preadult *Drosophila*  
749 *buzzatii*: variation among populations and changes in relative resistance across life stages.  
750 *Biol. J. Linn. Soc.* **56**, 517–531.

- 751 **Kroemer, G., Mariño, G. and Levine, B.** (2010). Autophagy and the integrated stress response.  
752 *Mol. Cell* **40**, 280–293.
- 753 **Kültz, D.** (2005). Molecular and evolutionary basis of the cellular stress response. *Annu. Rev.*  
754 *Physiol.* **67**, 225–257.
- 755 **Leader, D. P., Krause, S. A., Pandit, A., Davies, S. A. and Dow, J. A. T.** (2018). FlyAtlas 2: a  
756 new version of the *Drosophila melanogaster* expression atlas with RNA-Seq, miRNA-  
757 Seq and sex-specific data. *Nucleic Acids Res.* **46**, D809–D815.
- 758 **Li, B. and Dewey, C. N.** (2011). RSEM: accurate transcript quantification from RNA-Seq data  
759 with or without a reference genome. *BMC Bioinformatics* **12**, 323.
- 760 **Lockwood, B. L., Sanders, J. G. and Somero, G. N.** (2010). Transcriptomic responses to heat  
761 stress in invasive and native blue mussels (genus *Mytilus*): molecular correlates of  
762 invasive success. *J. Exp. Biol.* **213**, 3548–3558.
- 763 **Loeschcke, V. and Krebs, R. A.** (1996). Selection for heat-shock resistance in larval and in  
764 adult *Drosophila buzzatii*: comparing direct and indirect responses. *Evolution* **50**, 2354–  
765 2359.
- 766 **Lohman, B. K., Weber, J. N. and Bolnick, D. I.** (2016). Evaluation of TagSeq, a reliable low-  
767 cost alternative for RNAseq. *Mol. Ecol. Resour.* **16**, 1315–1321.
- 768 **MacMillan, H. A., Ferguson, L. V., Nicolai, A., Donini, A., Staples, J. F. and Sinclair, B. J.**  
769 (2015). Parallel ionoregulatory adjustments underlie phenotypic plasticity and evolution  
770 of *Drosophila* cold tolerance. *J. Exp. Biol.* **218**, 423–432.
- 771 **MacMillan, H. A., Knee, J. M., Dennis, A. B., Udaka, H., Marshall, K. E., Merritt, T. J. S.**  
772 **and Sinclair, B. J.** (2016). Cold acclimation wholly reorganizes the *Drosophila*  
773 *melanogaster* transcriptome and metabolome. *Sci. Rep.* **6**, 28999.

- 774 **McGraw, J. B. and Antonovics, J.** (1983). Experimental ecology of *Dryas octopetala* ecotypes:  
775 I. ecotypic differentiation and life-cycle stages of selection. *J. Ecol.* **71**, 879–897.
- 776 **Moran, N. A.** (1994). Adaptation and constraint in the complex life cycles of animals. *Annu.*  
777 *Rev. Ecol. Syst.* **25**, 573–600.
- 778 **Neufeld, T. P.** (2012). Autophagy and cell growth – the yin and yang of nutrient responses. *J.*  
779 *Cell Sci.* **125**, 2359–2368.
- 780 **Nilson, T. L., Sinclair, B. J. and Roberts, S. P.** (2006). The effects of carbon dioxide  
781 anesthesia and anoxia on rapid cold-hardening and chill coma recovery in *Drosophila*  
782 *melanogaster*. *J. Insect Physiol.* **52**, 1027–1033.
- 783 **Ohtsu, T., Kimura, M. T. and Katagiri, C.** (1998). How *Drosophila* species acquire cold  
784 tolerance. *Eur. J. Biochem.* **252**, 608–611.
- 785 **Overgaard, J. and MacMillan, H. A.** (2017). The integrative physiology of insect chill  
786 tolerance. *Annu. Rev. Physiol.* **79**, 187–208.
- 787 **Overgaard, J., Sørensen, J. G., Petersen, S. O., Loeschcke, V. and Holmstrup, M.** (2005).  
788 Changes in membrane lipid composition following rapid cold hardening in *Drosophila*  
789 *melanogaster*. *J. Insect Physiol.* **51**, 1173–1182.
- 790 **Parker, D. J., Vesala, L., Ritchie, M. G., Laiho, A., Hoikkala, A. and Kankare, M.** (2015).  
791 How consistent are the transcriptome changes associated with cold acclimation in two  
792 species of the *Drosophila virilis* group? *Heredity* **115**, 13–21.
- 793 **Philip, B. N. and Lee, R. E.** (2010). Changes in abundance of aquaporin-like proteins occurs  
794 concomitantly with seasonal acquisition of freeze tolerance in the goldenrod gall fly,  
795 *Eurosta solidaginis*. *J. Insect Physiol.* **56**, 679–685.

- 796 **R Core Team** (2021). R: A language and environment for statistical computing. *R Foundation*  
797 *for Statistical Computing*. Vienna, Austria. URL <https://www.R-project.org/>
- 798 **Ragland, G. J. and Kingsolver, J. G.** (2008). The effect of fluctuating temperatures on  
799 ectotherm life-history traits: comparisons among geographic populations of *Wyeomyia*  
800 *smithii*. *Evol. Ecol. Res.* **10**, 29–44.
- 801 **Ragland, G. J., Almskaar, K., Vertacnik, K. L., Gough, H. M., Feder, J. L., Hahn, D. A.**  
802 **and Schwarz, D.** (2015). Differences in performance and transcriptome-wide gene  
803 expression associated with *Rhagoletis* (Diptera: Tephritidae) larvae feeding in alternate  
804 host fruit environments. *Mol. Ecol.* **24**, 2759–2776.
- 805 **Robinson, M. D. and Oshlack, A.** (2010). A scaling normalization method for differential  
806 expression analysis of RNA-seq data. *Genome Biol.* **11**, R25.
- 807 **Robinson, M. D., McCarthy, D. J. and Smyth, G. K.** (2010). edgeR: a Bioconductor package  
808 for differential expression analysis of digital gene expression data. *Bioinformatics* **26**,  
809 139–140.
- 810 **Salehipour-shirazi, G., Ferguson, L. V. and Sinclair, B. J.** (2017). Does cold activate the  
811 *Drosophila melanogaster* immune system? *J. Insect Physiol.* **96**, 29–34.
- 812 **Sanghera, G. S., Wani, S. H., Hussain, W. and Singh, N. B.** (2011). Engineering cold stress  
813 tolerance in crop plants. *Curr. Genomics* **12**, 30–43.
- 814 **Sanil, D., Shetty, V. and Shetty, N. J.** (2014). Differential expression of glutathione s-  
815 transferase enzyme in different life stages of various insecticide-resistant strains of  
816 *Anopheles stephensi*: a malaria vector. *J. Vector Borne Dis.* **9**.
- 817 **Schluter, D., Price, T. D., Rowe, L. and Grant, P. R.** (1991). Conflicting selection pressures  
818 and life history trade-offs. *Proc. R. Soc. Lond. B.* **246**, 11–17.



- 819 **Schoville, S. D., Barreto, F. S., Moy, G. W., Wolff, A. and Burton, R. S.** (2012). Investigating  
820 the molecular basis of local adaptation to thermal stress: population differences in gene  
821 expression across the transcriptome of the copepod *Tigriopus californicus*. *BMC Evol.*  
822 *Biol.* **12**, 170.
- 823 **Sinclair, B. J. and Marshall, K. E.** (2018). The many roles of fats in overwintering insects. *J.*  
824 *Exp. Biol.* **221**,.
- 825 **Sinclair, B. J., Gibbs, A. G. and Roberts, S. P.** (2007). Gene transcription during exposure to,  
826 and recovery from, cold and desiccation stress in *Drosophila melanogaster*. *Insect Mol.*  
827 *Biol.* **16**, 435–443.
- 828 **Sinclair, B. J., Ferguson, L. V., Salehipour-shirazi, G. and MacMillan, H. A.** (2013). Cross-  
829 tolerance and cross-talk in the cold: relating low temperatures to desiccation and immune  
830 stress in insects. *Integr. Comp. Biol.* **53**, 545–556.
- 831 **Sørensen, J. G., Nielsen, M. M., Kruhøffer, M., Justesen, J. and Loeschcke, V.** (2005). Full  
832 genome gene expression analysis of the heat stress response in *Drosophila melanogaster*.  
833 *Cell Stress Chaperones* **10**, 312–328.
- 834 **Strode, C., Steen, K., Ortelli, F. and Ranson, H.** (2006). Differential expression of the  
835 detoxification genes in the different life stages of the malaria vector *Anopheles gambiae*.  
836 *Insect Mol. Biol.* **15**, 523–530.
- 837 **Su, Y., Wei, H., Bi, Y., Wang, Y., Zhao, P., Zhang, R., Li, X., Li, J. and Bao, J.** (2019). Pre-  
838 cold acclimation improves the immune function of trachea and resistance to cold stress in  
839 broilers. *J. Cell. Physiol.* **234**, 7198–7212.

- 840 **Sun, Z., Tan, X., Liu, Q., Ye, H., Zou, C., Xu, M., Zhang, Y. and Ye, C.** (2019).  
841 Physiological, immune responses and liver lipid metabolism of orange-spotted grouper  
842 (*Epinephelus coioides*) under cold stress. *Aquaculture* **498**, 545–555.
- 843 **Teets, N. M. and Hahn, D. A.** (2018). Genetic variation in the shape of cold-survival curves in a  
844 single fly population suggests potential for selection from climate variability. *J. Evol.*  
845 *Biol.* **31**, 543–555.
- 846 **Tucić, N.** (1979). Genetic capacity for adaptation to cold resistance at different developmental  
847 stages of *Drosophila melanogaster*. *Evolution* **33**, 350–358.
- 848 **van Gestel, J., Ackermann, M. and Wagner, A.** (2019). Microbial life cycles link global  
849 modularity in regulation to mosaic evolution. *Nat. Ecol. Evol.* **3**, 1184–1196.
- 850 **Vermeulen, C. J., Sørensen, P., Gagalova, K. K. and Loeschcke, V.** (2013). Transcriptomic  
851 analysis of inbreeding depression in cold-sensitive *Drosophila melanogaster* shows  
852 upregulation of the immune response. *J. Evol. Biol.* **26**, 1890–1902.
- 853 **Wang, R. C. and Levine, B.** (2010). Autophagy in cellular growth control. *FEBS Lett.* **584**,  
854 1417–1426.
- 855 **Woods, H. A.** (2013). Ontogenetic changes in the body temperature of an insect herbivore.  
856 *Funct. Ecol.* **27**, 1322–1331.
- 857 **Yanai, I., Benjamin, H., Shmoish, M., Chalifa-Caspi, V., Shklar, M., Ophir, R., Bar-Even,**  
858 **A., Horn-Saban, S., Safran, M., Domany, E., et al.** (2005). Genome-wide midrange  
859 transcription profiles reveal expression level relationships in human tissue specification.  
860 *Bioinformatics* **21**, 650–659.

- 861 **Yang, J., Li, D., Liu, H., Liu, Y., Huang, M., Wang, H., Chen, Z. and Guo, T.** (2020).  
862 Identification of QTLs involved in cold tolerance during the germination and bud stages  
863 of rice (*Oryza sativa* L.) via a high-density genetic map. *Breed. Sci.* **70**, 292–302.
- 864 **Yocum, G. D.** (2001). Differential expression of two *HSP70* transcripts in response to cold  
865 shock, thermoperiod, and adult diapause in the Colorado potato beetle. *J. Insect Physiol.*  
866 **47**, 1139–1145.
- 867 **Zhang, T., Zhao, X., Wang, W., Pan, Y., Huang, L., Liu, X., Zong, Y., Zhu, L., Yang, D.**  
868 **and Fu, B.** (2012). Comparative transcriptome profiling of chilling stress responsiveness  
869 in two contrasting rice genotypes. *PLOS ONE* **7**, e43274.
- 870  
871  
872

## A: Experiment 1 (RNASeq)

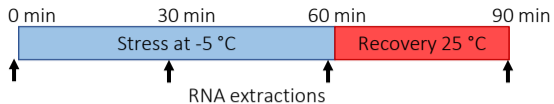

### Conserved response to stress

#### i. Response during stress

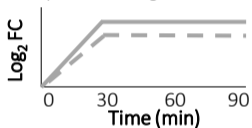

#### ii. Response during recovery

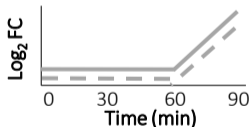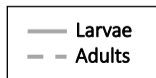

### Stage-specific response to stress

#### iii. Adult response only

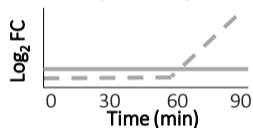

#### iv. Larval response only

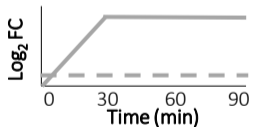

#### v. Different adult & larval response

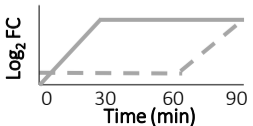

## B: Experiment 2 (RNAi)

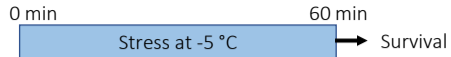

### Conserved role in cold tolerance

#### i. *Gene X* improves tolerance

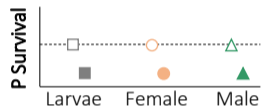

#### ii. *Gene X* impairs tolerance

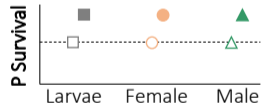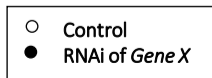

### Stage-specific role in cold tolerance

#### iii. *Gene X* improves only adult tolerance

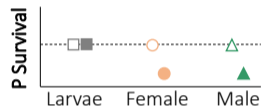

#### iv. *Gene X* improves only larval tolerance

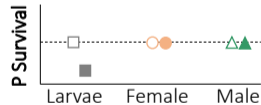

#### v. *Gene X* has opposing functions in larval & adult tolerance

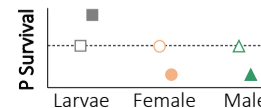

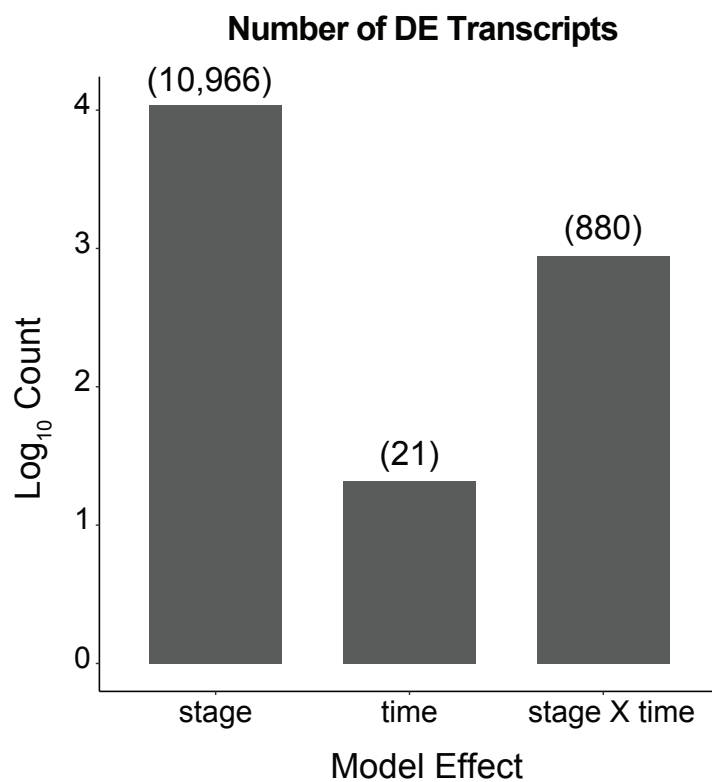

Figure 2. Number of transcripts demonstrating significant (FDR < 0.05) effects of stage (larva or adult), time (t0, t30, t60, t90), or a stage X time interaction. The y-axis is log10 scaled; actual counts are reported above each bar.

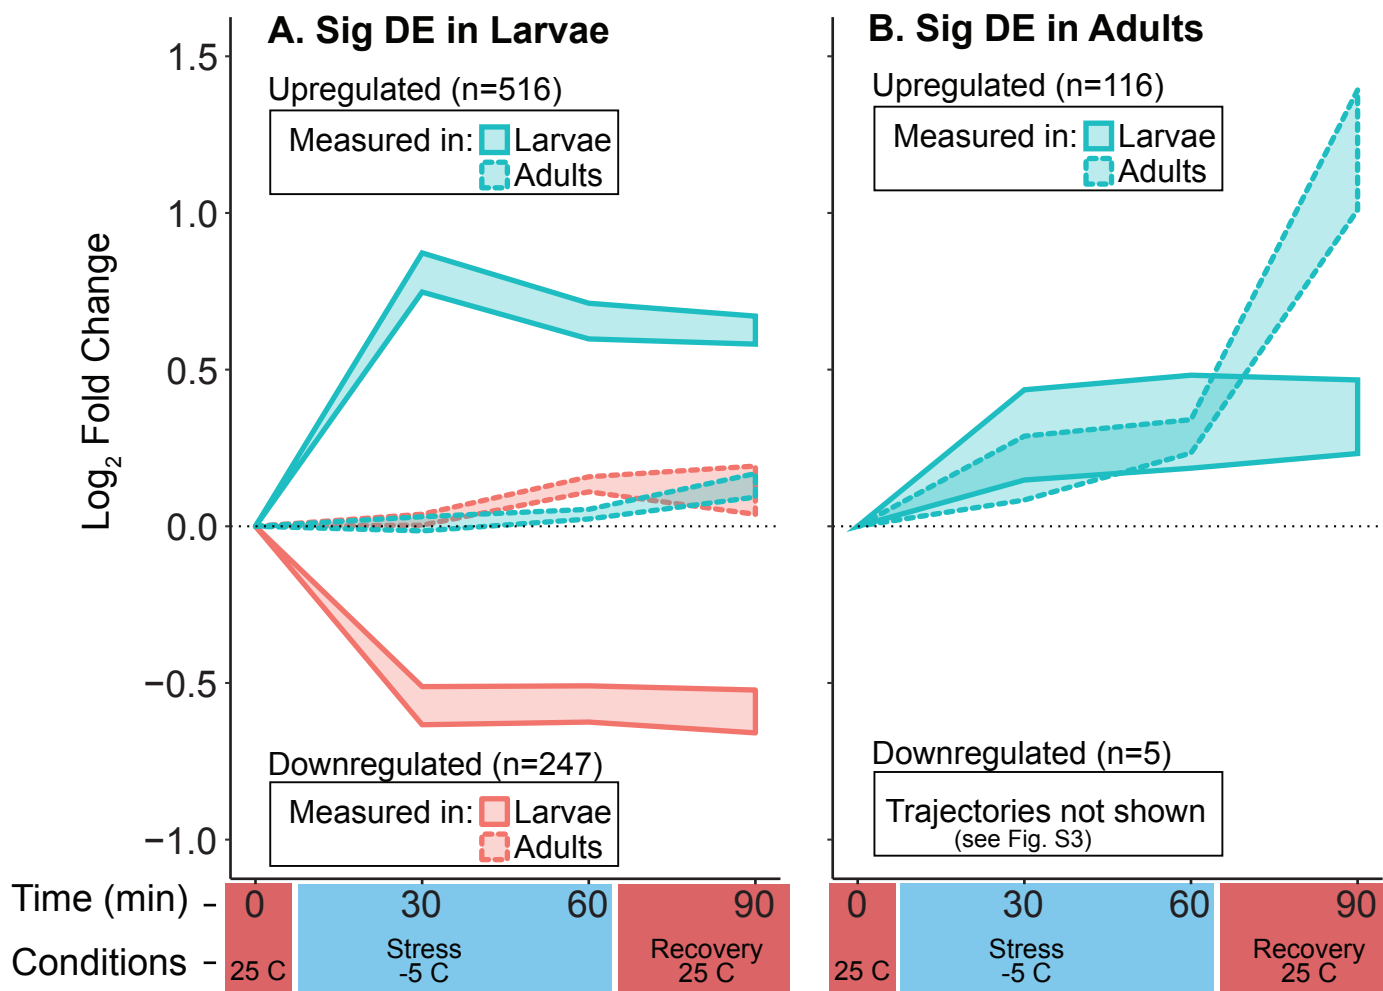

Figure 3. Trajectories of differential expression (DE) during and after cold exposure for transcripts significantly ( $FDR < 0.05$ ) DE across at least two time points in larvae (A) or adults (B). For comparison, the same transcripts measured in larvae (solid borders) and adults (dashed borders) are plotted. Blue indicates transcripts significantly up-regulated on average in larvae (A) or adults (B), while pink indicates transcripts down-regulated on average in those respective life stages. Y-axis values are  $\text{log}_2$  fold changes at each time point relative to the first ( $t_0$ ) time point. Shaded regions are 95% Confidence intervals (CI) for each group of transcripts designated in the legends. For example, the blue shaded region with a solid boundary in (A) represents 516 transcripts significantly up-regulated (on average) in larvae, while the blue shaded region with a dashed boundary represents those same transcripts measured in adults. Darker red and blue on the x-axis denote the temperature at which individuals were sampled over the time course.

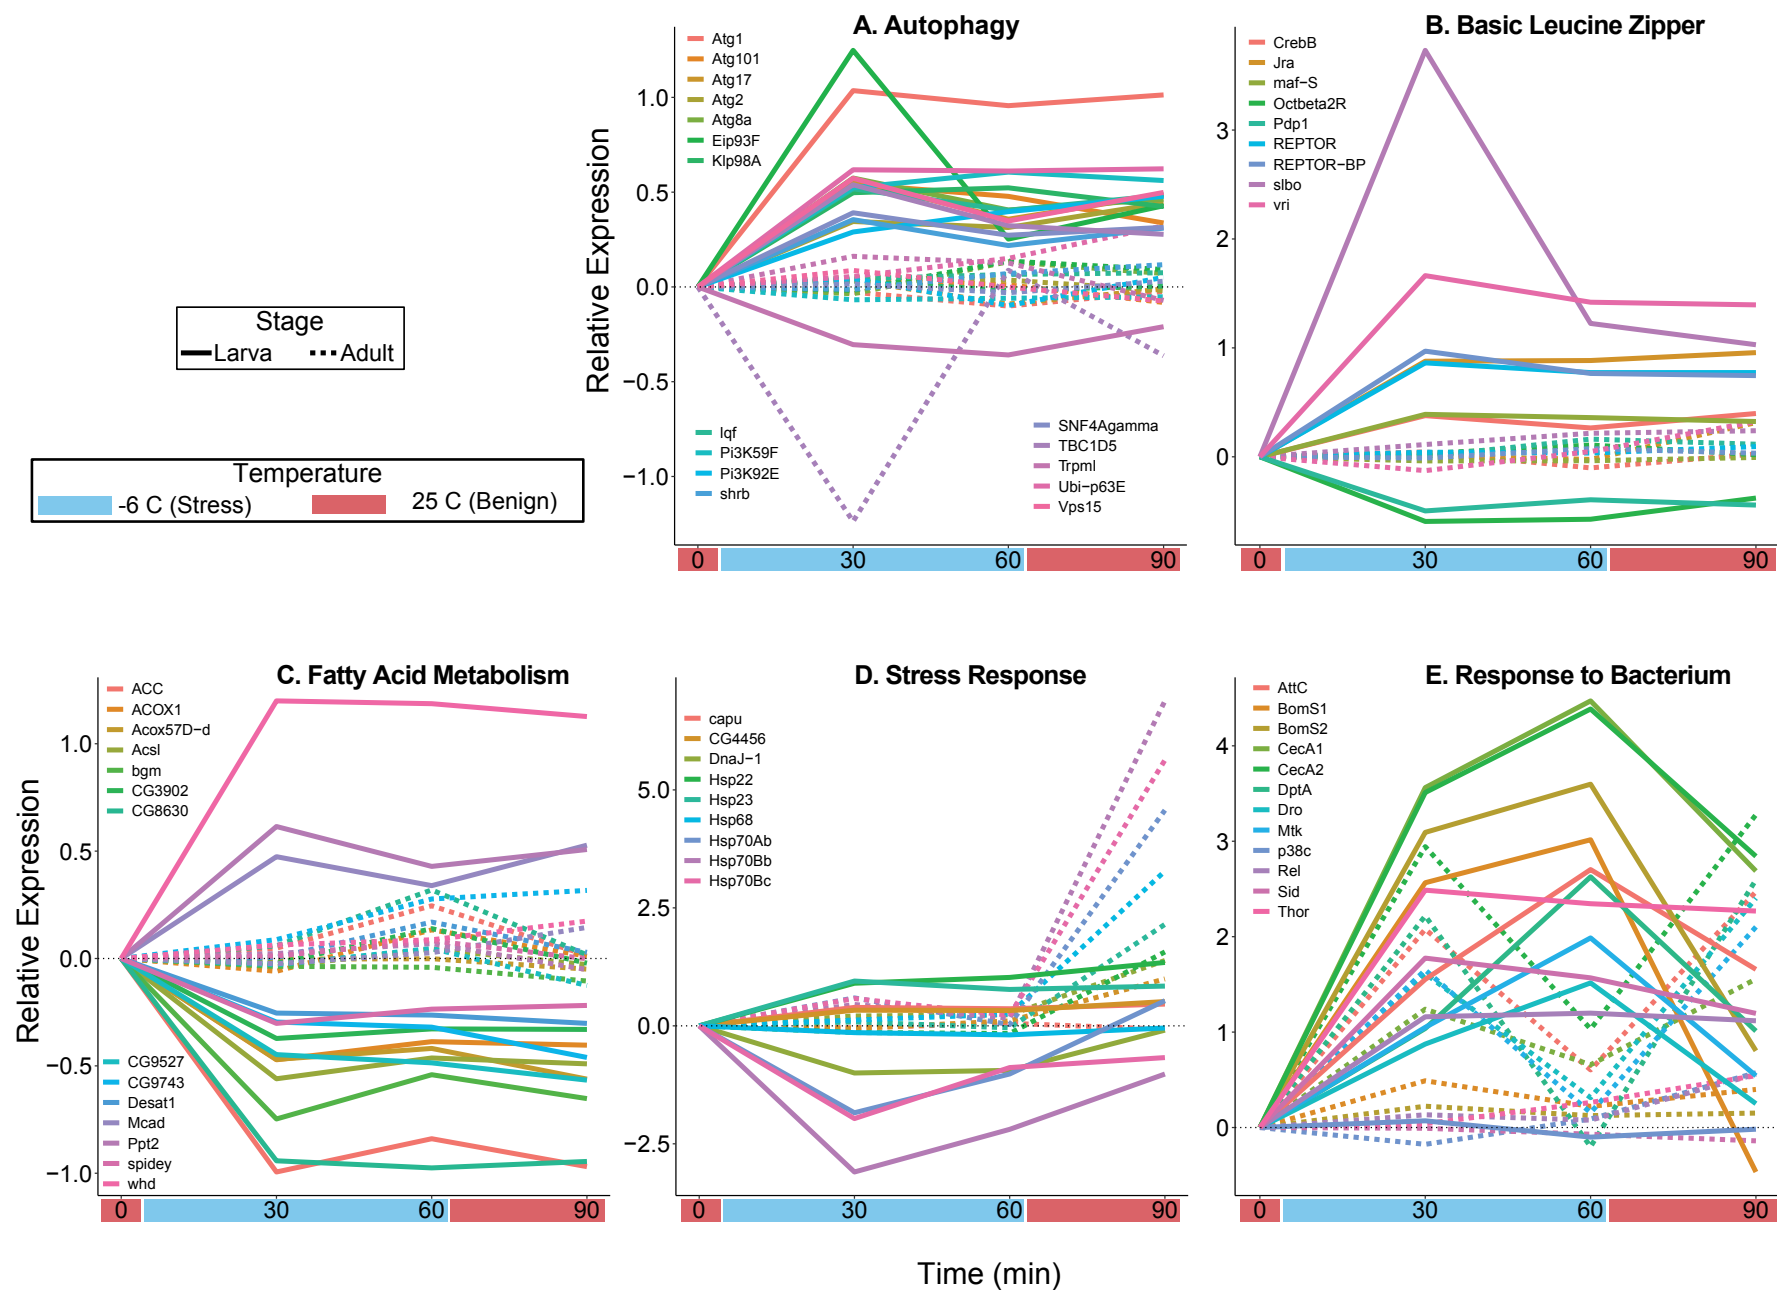

Figure 4. Trajectories of differential expression during and after cold exposure for transcripts in select functional categories enriched in the set of all transcripts significantly differentially expressed across at least two time points in larvae or adults. Y-axis values are log<sub>2</sub> fold changes at each time point relative to the first (t<sub>0</sub>)

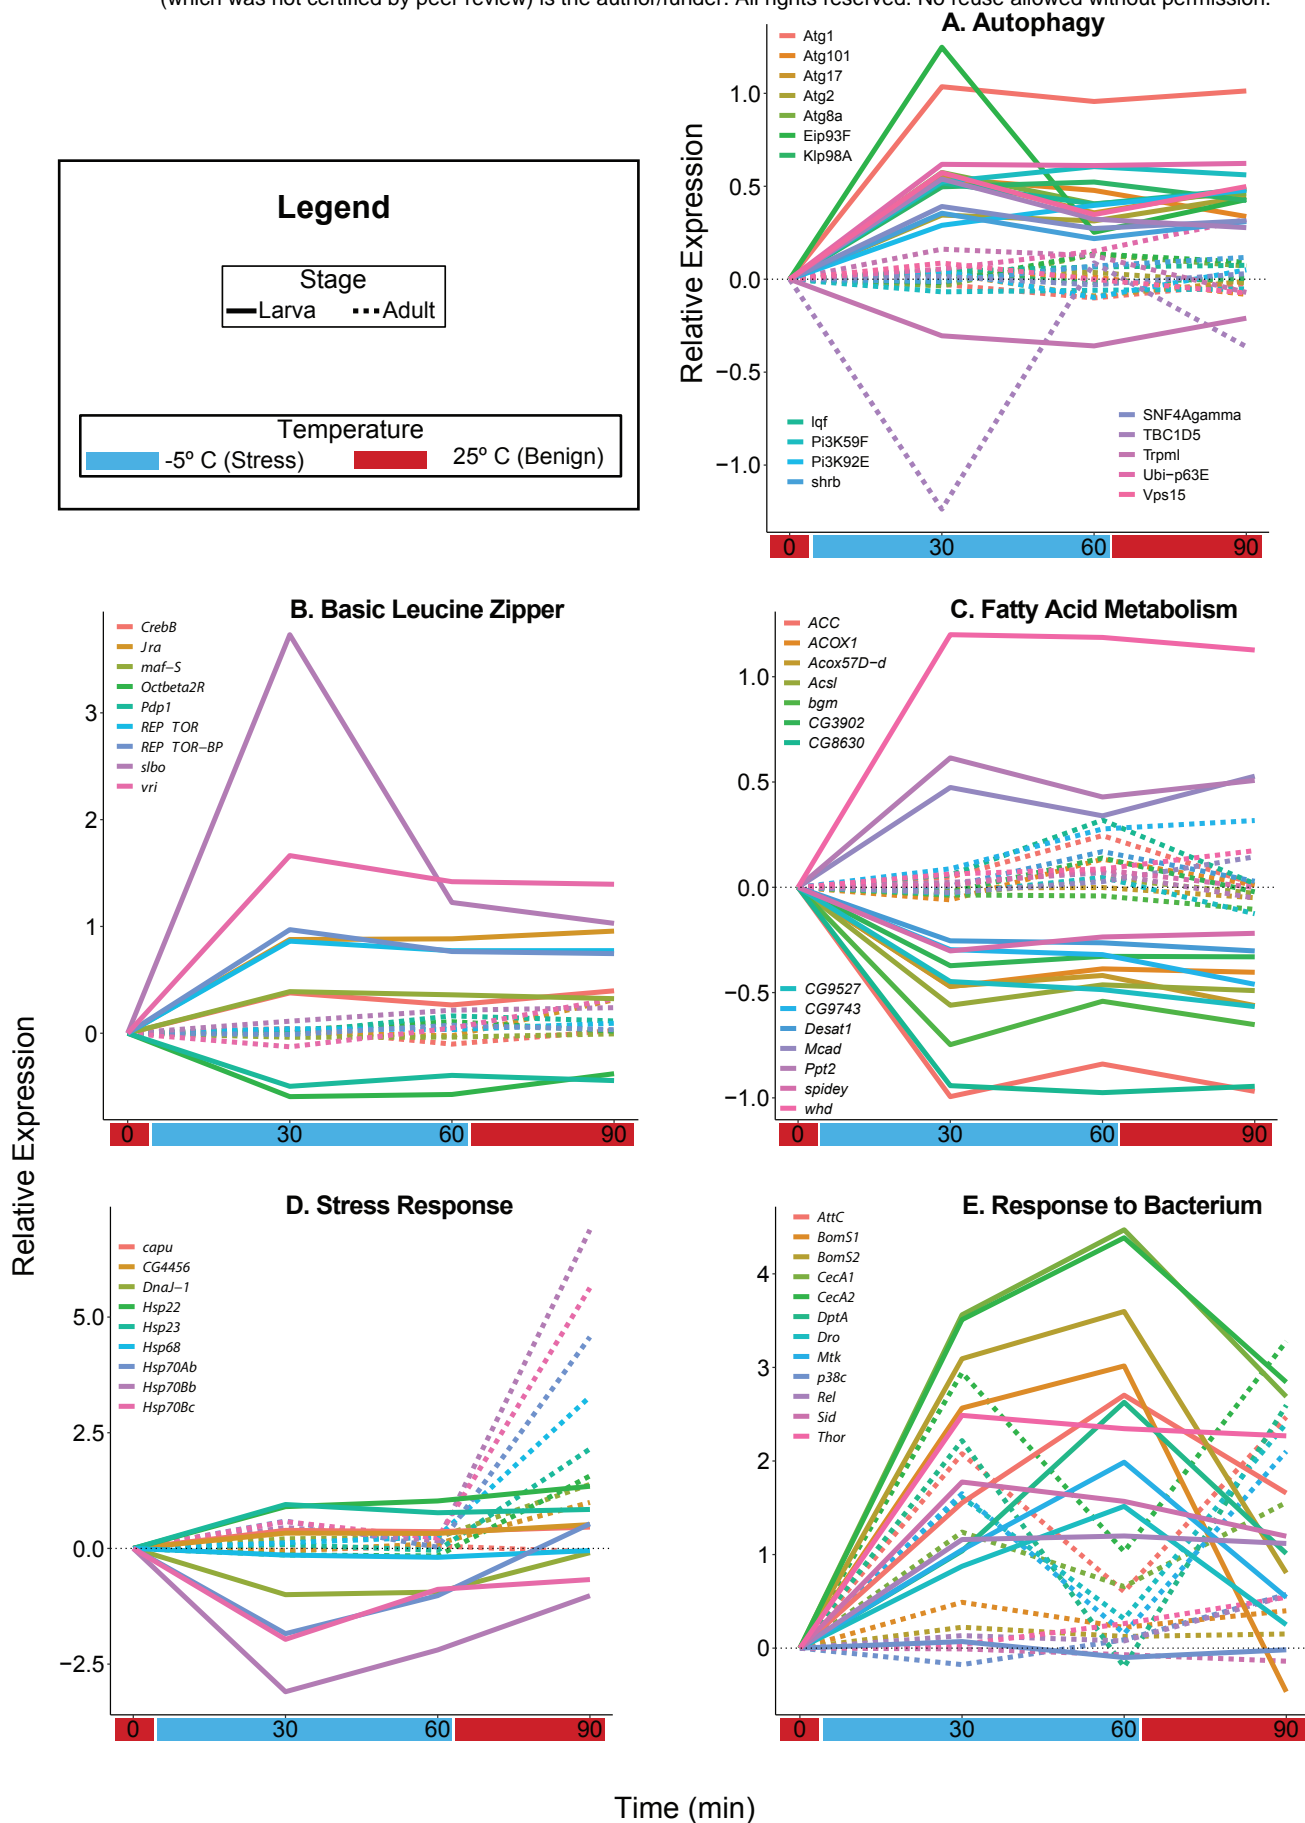

Figure 4. Trajectories of differential expression during and after cold exposure for transcripts in select functional categories enriched in the set of all transcripts significantly differentially expressed across at least two time points in larvae or adults. Y-axis values are log<sub>2</sub> fold changes at each time point relative to the first (t<sub>0</sub>)



Proportion Survival Relative to Control

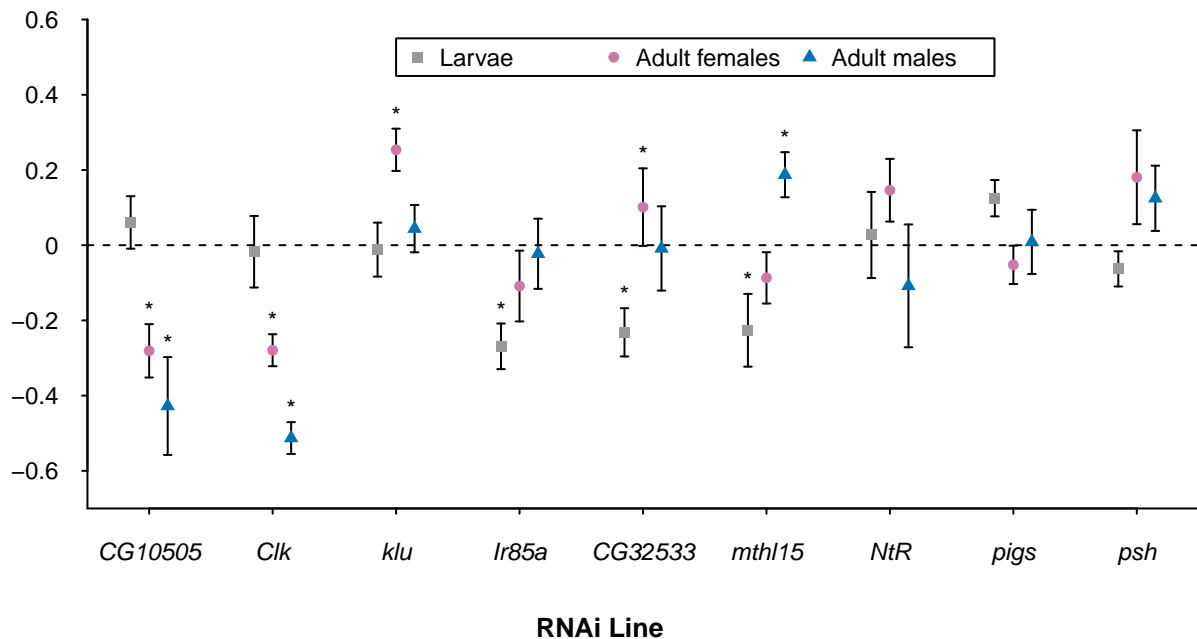

Source: https://www.biorxiv.org/content/10.1101/2022.01.16.476527v1.full.pdf
